# Supplementary material for: Synthesis of 1,4-dithiins and 1,4-diselenins from alkynes and elemental sulfur/selenium under transition metal-free conditions with high regioselectivity
Source: Royal Society of Chemistry journal article supplement (doi:10.1039/d3qo00364g), 2023-01-01
Supplement: d3qo00364g1.pdf [file d3qo00364g1.pdf]

Supplementary Information

**Synthesis Of 1,4-Dithiins And 1,4-Diselenins From Alkynes And  
Elemental Sulfur/Selenium Under Transition-Metal-Free Conditions  
With High Regioselectivity**

Lu Cheng,<sup>†</sup> Mengdan Wang,<sup>†</sup> Yingge Gu,<sup>†</sup> Peng He,<sup>†</sup> Zongkang Wang,<sup>†</sup> Ziyi Zhuang,<sup>†</sup> Lingkai Kong,<sup>\*‡</sup> Yanzhong Li<sup>\*†</sup>

<sup>†</sup>School of Chemistry and Molecular Engineering, East China Normal University, 500 Dongchuan Road, Shanghai, 200241, China

<sup>‡</sup>School of Chemistry and Chemical Engineering, Linyi University, Shuangling Road, Linyi, Shandong, 276000, China

Fax: (+86) 021-54340096, E-mail: [yzli@chem.ecnu.edu.cn](mailto:yzli@chem.ecnu.edu.cn)

## Table of contents

|                                                                                       |        |
|---------------------------------------------------------------------------------------|--------|
| 1. General information .....                                                          | - 2 -  |
| 2. Synthesis of alkynones <b>1</b> .....                                              | - 3 -  |
| 3. Experimental Section.....                                                          | - 4 -  |
| 3.1 General procedure for the synthesis of 1,4-dithiins <b>3</b> and <b>3'</b> .....  | - 4 -  |
| 3.2 General procedure for the synthesis of 1,4-diselenin <b>4</b> and <b>4'</b> ..... | - 5 -  |
| 3.3 Characterization data of products .....                                           | - 6 -  |
| 3.4 Further transformations of <b>3a</b> .....                                        | - 17 - |
| 3.5 Gram-scale experiment.....                                                        | - 20 - |
| 4. References .....                                                                   | - 21 - |
| 5. Copies of NMR spectra .....                                                        | - 22 - |
| 6. X-Ray Crystal Structure of <b>3h</b> (CCDC: 2201657 ) .....                        | - 50 - |

### 1. General information

Unless otherwise stated, all experiments were carried out under the atmosphere of nitrogen gas. Visualization of spots on TLC plate was accomplished with UV light (254 nm). All commercial reagents were used without further purification. Reactions were monitored by thin layer chromatography. Purification of reaction products was carried out by flash chromatography on silica gel (200~300 mesh). NMR spectra were recorded on Bruker AV-500 or Bruker AV-600 NMR spectrometer. <sup>1</sup>H NMR spectra was recorded with tetramethylsilane ( $\delta = 0.00$  ppm) as internal reference; <sup>13</sup>C NMR spectra was recorded with CDCl<sub>3</sub> ( $\delta = 77.00$  ppm) as internal reference. The following abbreviations (or combinations thereof) were used to explain multiplicities: s = singlet, d = doublet, m = multiplet. High-resolution mass spectra were performed on a mass spectrometer with a TOF (for EI or ESI) or FTICR (for MALDI) analyzer. Single crystal X-ray diffraction data was collected in Bruker SMARTAPEX diffractometers.

## 2. Synthesis of alkynones 1

All the substrates **1** are known compounds and have been prepared according to methods reported in the previous literature.

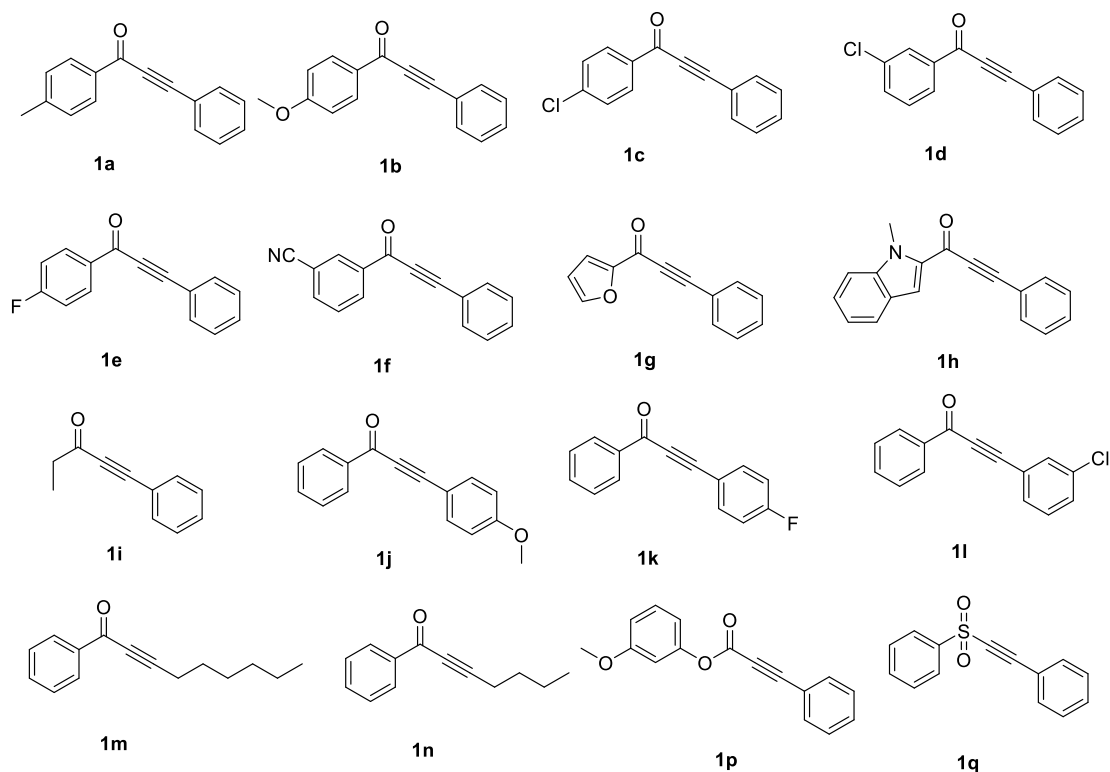

**1a**, **1b**, **1c**, **1e**, **1j**, **1k**<sup>1</sup>; **1h**<sup>2</sup>; **1d**, **1g**<sup>3</sup>, **1i**<sup>4</sup>, **1l**<sup>5</sup>, **1m**<sup>6</sup>, **1n**<sup>7</sup>, **1p**<sup>8</sup>, **1q**<sup>9</sup>

Synthesis of **1f**

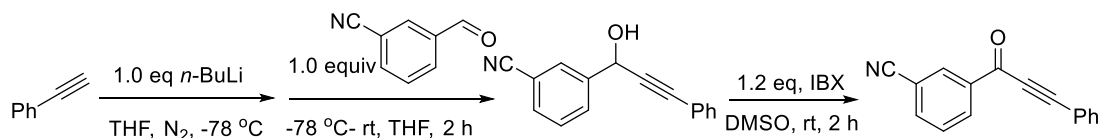

To a solution of alkyne (12 mmol) in anhydrous THF (30 mL), *n*-BuLi (2.5M, 10 mmol, 4 mL) was added at -78 °C. The resulting mixture was stirred at -78 °C for 1 h, then the aldehyde (10 mmol) was added and the reaction temperature was raised to room temperature till aldehyde disappeared by TLC analysis. The resulting mixture was quenched with a saturated solution of NH<sub>4</sub>Cl and extracted with ethyl acetate (20 mL × 3). The combined organic layers were washed with brine and dried over anhydrous Na<sub>2</sub>SO<sub>4</sub>, filtered, and concentrated under reduced pressure. Purification by column chromatography with petroleum ether/ethyl acetate = 5:1 as the eluent afforded the

substituted alkynol.

To a solution of substituted alkynol (10 mmol) in DMSO (20 mL) in round-bottom flask, IBX (12 mmol, 3.36 g) was added at room temperature. The reaction was stirred in air until the full conversion of substituted alkynol monitored by thin-layer chromatography. The resulting mixture was quenched with water (20 mL) and filtered. Then the filtrate was extracted with ethyl acetate (20 mL  $\times$  3). The organic layers was combined, washed with brine, dried over anhydrous Na<sub>2</sub>SO<sub>4</sub>, filtered and concentrated under reduced pressure. Purification by column chromatography with petroleum ether/ethyl acetate = 10:1 as white solid in 65% yield.

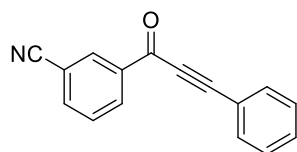

<sup>1</sup>H NMR (500 MHz, CDCl<sub>3</sub>)  $\delta$  8.50 (s, 1H), 8.44-8.42 (m, 1H), 7.92-7.90 (m, 1H), 7.73-7.66 (m, 3H), 7.56-7.51 (m, 1H), 7.48-7.44 (m, 2H). <sup>13</sup>C NMR (125 MHz, CDCl<sub>3</sub>)  $\delta$  175.59, 137.53, 136.77, 133.25, 133.19, 133.10, 131.36, 129.69, 128.81, 119.36, 117.78, 113.23, 95.02, 86.12. m.p. 126 - 128 °C. HRMS (ESI) calcd for C<sub>16</sub>H<sub>10</sub>NO [M + H]<sup>+</sup>: 232.0757, found: 232.0761.

### 3. Experimental Section

#### 3.1 General procedure for the synthesis of 1,4-dithiins **3** and **3'**

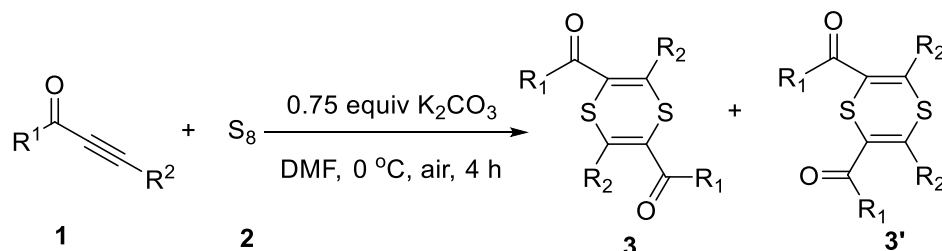

In an oven-dried Schlenk tube was charged with a stir bar, alkynones **1** (0.30 mmol, 1.0 equiv), elemental sulfur **2** (0.05 mmol, 12.8 mg), K<sub>2</sub>CO<sub>3</sub> (0.225 mmol, 31.1 mg) and

DMF (3.0 mL). The mixture was stirred at 0 °C for 4 hours. Upon completion of the reaction, the reaction mixture was quenched by water. The aqueous layer was extracted with ethyl acetate (10 mL × 3). The combined organic layers were washed with brine, dried with anhydrous Na<sub>2</sub>SO<sub>4</sub>, filtered, and concentrated under reduced pressure. The products **3** and **3'** were isolated by column chromatography on silica gel (eluted with PE/EA, v:v) and the ratio of **3** and **3'** was analyzed by calculating peak areas in <sup>1</sup>H NMR spectra.

### 3.2 General procedure for the synthesis of 1,4-diselenin **4** and **4'**

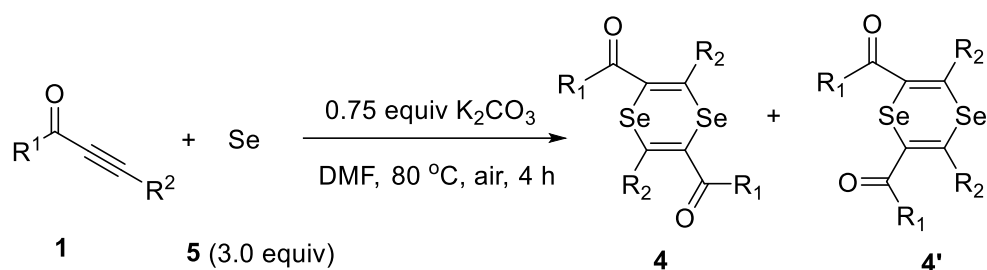

In an oven-dried Schlenk tube was charged with a stir bar, alkynones **1** (0.30 mmol, 1.0 equiv), elemental selenium **5** (0.90 mmol, 71.1 mg), K<sub>2</sub>CO<sub>3</sub> (0.225 mmol, 31.1 mg) and DMF (3.0 mL). The mixture was stirred at 80 °C for 4 hours. Upon completion of the reaction, the reaction mixture was quenched by water. The aqueous layer was extracted with ethyl acetate (10 mL × 3). The combined organic layers were washed with brine, dried with anhydrous Na<sub>2</sub>SO<sub>4</sub>, filtered, and concentrated under reduced pressure. The products **4** and **4'** were isolated by column chromatography on silica gel (eluted with PE/EA, v:v) and the ratio of **4** and **4'** was analyzed by calculating the ratio of peak areas in <sup>1</sup>H NMR spectra.

### 3.3 Characterization data of products

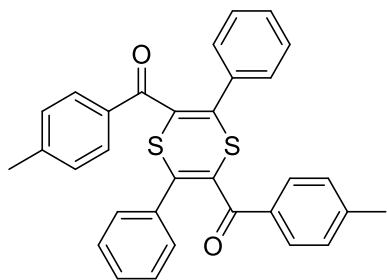

**(3,6-diphenyl-1,4-dithiine-2,5-diyl)bis(p-tolylmethanone) (3a)** Following the general procedure, the crude product was purified by column chromatography (PE/EA = 10:1, v/v) to provide the desired compound as a yellow solid (**3a:3a'** = 7:1, 71.2 mg, 94% total yield). m.p. 156 - 158 °C. <sup>1</sup>H NMR (500 MHz, CDCl<sub>3</sub>) δ 7.76 - 7.73 (m, 4H), 7.37 - 7.33 (m, 4H), 7.19 - 7.10 (m, 10H), 2.36 (s, 6H). <sup>13</sup>C NMR (125 MHz, CDCl<sub>3</sub>) δ 191.48, 146.56, 144.98, 135.08, 132.56, 130.94, 129.70, 129.64, 129.55, 129.44, 128.40, 21.75. HRMS (ESI) calcd for C<sub>32</sub>H<sub>24</sub>O<sub>2</sub>S<sub>2</sub>Na [M + Na]<sup>+</sup>: 527.1110, found: 527.1108.

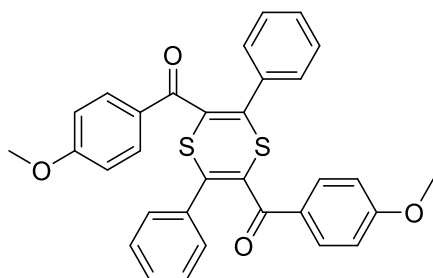

**(3,6-diphenyl-1,4-dithiine-2,5-diyl)bis((4-methoxyphenyl)methanone) (3b)** Following the general procedure, the crude product was purified by column chromatography (PE/EA = 10:1, v/v) to provide the desired compound as a yellow solid (**3b:3b'** = 5:1, 72.4 mg, 90% total yield). m.p. 189 - 191 °C. <sup>1</sup>H NMR (500 MHz, CDCl<sub>3</sub>) δ 7.84 - 7.82 (m, 4H), 7.38 - 7.35 (m, 4H), 7.17 - 7.13 (m, 6H), 6.86 - 6.84 (m, 4H), 3.83 (s, 6H). <sup>13</sup>C NMR (125 MHz, CDCl<sub>3</sub>) δ 190.50, 164.18, 146.10, 135.19, 132.03, 131.19, 129.59, 129.51, 128.41, 128.02, 114.02, 55.51. HRMS (ESI) calcd for C<sub>32</sub>H<sub>24</sub>O<sub>4</sub>S<sub>2</sub>Na [M + Na]<sup>+</sup>: 559.1008, found: 529.1003.

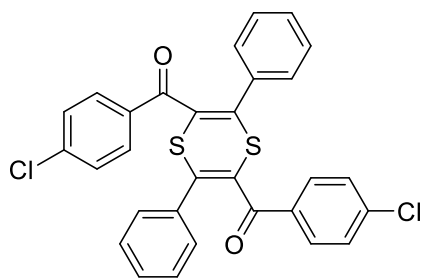

**(3,6-diphenyl-1,4-dithiine-2,5-diyl)bis((4-chlorophenyl)methanone) (3c)** Following the general procedure, the crude product was purified by column chromatography (PE/EA = 12:1, v/v) to provide the desired compound as a yellow solid (**3c:3c'** = 11:1, 73.5 mg, 90% total yield ). m.p. 128 - 130 °C. <sup>1</sup>H NMR (500 MHz, CDCl<sub>3</sub>) δ 7.76 - 7.72 (m, 4H), 7.35 - 7.29 (m, 8H), 7.23 - 7.13 (m, 6H). <sup>13</sup>C NMR (125 MHz, CDCl<sub>3</sub>) δ 190.43, 148.11, 140.44, 134.80, 133.53, 130.78, 130.12, 130.05, 129.64, 129.10, 128.64. HRMS (ESI) calcd for C<sub>30</sub>H<sub>18</sub>Cl<sub>2</sub>O<sub>2</sub>S<sub>2</sub>Na [M + Na]<sup>+</sup>: 567.0018, found: 567.0013.

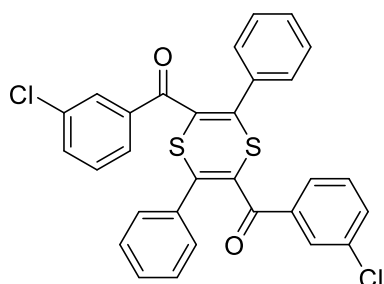

**(3,6-diphenyl-1,4-dithiine-2,5-diyl)bis((3-chlorophenyl)methanone) (3d)** Following the general procedure, the crude product was purified by column chromatography (PE/EA = 12:1, v/v) to provide the desired compound as a yellow solid (**3d:3d'** = 7:1, 70.0 mg, 82% total yield ). m.p. 138 - 140 °C. <sup>1</sup>H NMR (500 MHz, CDCl<sub>3</sub>) δ 7.78 - 7.77 (m, 2H), 7.66 - 7.63 (m, 2H), 7.45 - 7.42 (m, 2H), 7.34 - 7.27 (m, 6H), 7.22 - 7.14 (m, 6H) <sup>13</sup>C NMR (125 MHz, CDCl<sub>3</sub>) δ 190.28, 148.72, 136.73, 134.94, 134.79, 133.64, 130.12, 130.02, 129.77, 129.64, 129.34, 128.62, 127.46. HRMS (ESI) calcd for C<sub>30</sub>H<sub>18</sub>Cl<sub>2</sub>O<sub>2</sub>S<sub>2</sub>Na [M + Na]<sup>+</sup>: 567.0018, found: 567.0012.

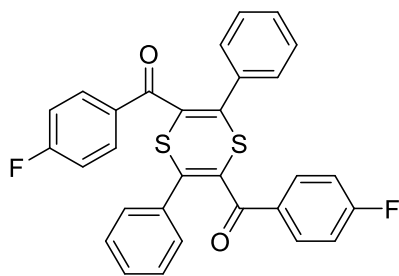

**(3,6-diphenyl-1,4-dithiine-2,5-diyl)bis((4-fluorophenyl)methanone) (3e)** Following the general procedure, the crude product was purified by column chromatography (PE/EA = 12:1, v/v) to provide the desired compound as a yellow solid (**3d:3d'** = 12:1, 70.7 mg, 92% total yield). m.p. 136 - 138 °C.  $^{13}\text{C}$  NMR (125 MHz,  $\text{CDCl}_3$ )  $\delta$  7.85 - 7.82 (m, 4H), 7.34 - 7.31 (m, 4H), 7.22 - 7.13 (m, 6H), 7.06 - 7.01 (m, 4H).  $^{13}\text{C}$  NMR (125 MHz,  $\text{CDCl}_3$ )  $\delta$  190.14, 166.05 (d,  $J = 255.0$  Hz), 147.80, 134.88, 132.16 (d,  $J = 10.0$  Hz), 131.56 (d,  $J = 2.50$  Hz), 130.35, 129.94, 129.61, 128.57, 115.99 (d,  $J = 21.25$  Hz). **HRMS** (ESI) calcd for  $\text{C}_{30}\text{H}_{18}\text{F}_2\text{O}_2\text{S}_2\text{Na}$  [ $\text{M} + \text{Na}$ ] $^+$ : 535.0609, found: 535.0601.

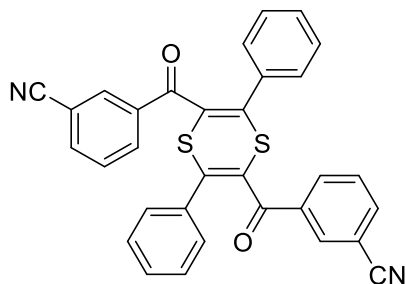

**3,3'-(3,6-diphenyl-1,4-dithiine-2,5-dicarbonyl)dibenzonitrile (3f)** Following the general procedure, the crude product was purified by column chromatography (PE/EA = 8:1, v/v) to provide the desired compound as a red solid (**3f:3f'** = 3:1, 67.9 mg, 86% total yield). m.p. 146 - 148 °C.  $^1\text{H}$  NMR (500 MHz,  $\text{CDCl}_3$ )  $\delta$  8.03 - 8.01 (m, 2H), 7.95 - 7.91 (m, 2H), 7.73 - 7.70 (m, 2H), 7.52 - 7.48 (m, 2H), 7.32 - 7.29 (m, 4H), 7.23 - 7.15 (m, 6H).  $^{13}\text{C}$  NMR (125 MHz,  $\text{CDCl}_3$ )  $\delta$  189.29, 150.32, 136.32, 136.16, 134.57, 132.93, 132.84, 130.57, 129.78, 129.76, 128.82, 128.75, 117.51, 113.22. **HRMS** (ESI) calcd for  $\text{C}_{32}\text{H}_{18}\text{N}_2\text{O}_2\text{S}_2\text{Na}$  [ $\text{M} + \text{Na}$ ] $^+$ : 549.0702, found: 549.0696.



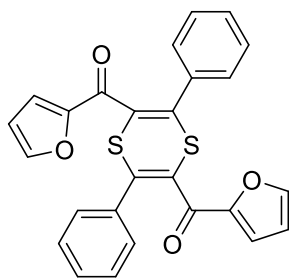

**(3,6-diphenyl-1,4-dithiine-2,5-diyl)bis(furan-2-ylmethanone) (3g)** Following the general procedure, the crude product was purified by column chromatography (PE/EA = 11:1, v/v) to provide the desired compound as a yellow solid (**3g**:**3g'** = 12:1, 65.1 mg, 95% total yield). m.p. 167 - 169 °C. <sup>1</sup>H NMR (500 MHz, CDCl<sub>3</sub>) δ 7.47 - 7.40 (m, 6H), 7.27 - 7.18 (m, 6H), 7.04 - 7.01 (m, 2H), 6.40 - 6.37 (m, 2H). <sup>13</sup>C NMR (125 MHz, CDCl<sub>3</sub>) δ 178.89, 150.96, 149.96, 147.68, 135.12, 129.87, 129.68, 128.83, 128.52, 120.56, 112.61. HRMS (ESI) calcd for C<sub>26</sub>H<sub>16</sub>O<sub>4</sub>S<sub>2</sub>Na [M + Na]<sup>+</sup>: 479.0382, found: 479.0374.

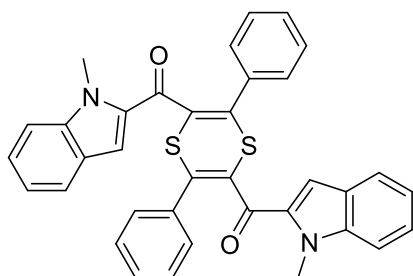

**(3,6-diphenyl-1,4-dithiine-2,5-diyl)bis((1-methyl-1H-indol-2-yl)methanone) (3h)** Following the general procedure, the crude product was purified by column chromatography (PE/EA = 7:1, v/v) to provide the desired compound as a yellow solid (**3h**:**3h'** = 9:1, 77.8 mg, 89% total yield). <sup>1</sup>H NMR (500 MHz, CDCl<sub>3</sub>) δ 7.64-7.61 (m, 2H), 7.48-7.45 (m, 4H), 7.40-7.34 (m, 4H), 7.19 (s, 2H), 7.16-7.11 (m, 8H), 4.08 (s, 6H). m.p. 178 - 180 °C. <sup>13</sup>C NMR (125 MHz, CDCl<sub>3</sub>) δ 184.08, 147.05, 140.95, 135.49, 133.85, 131.41, 129.56, 129.53, 128.46, 126.71, 125.86, 123.36, 120.99, 115.10, 110.40, 31.98. HRMS (ESI) calcd for C<sub>36</sub>H<sub>26</sub>N<sub>2</sub>O<sub>2</sub>S<sub>2</sub>Na [M + Na]<sup>+</sup>: 605.1328, found: 605.1321. **3h'**: <sup>1</sup>H NMR (500 MHz, CDCl<sub>3</sub>) δ 7.64-7.60 (m, 6H), 7.34-7.24 (m, 10H), 7.21 (s, 2H), 7.11-7.07 (m, 2H), 3.92 (s, 6H). <sup>13</sup>C NMR (125 MHz, CDCl<sub>3</sub>) δ 183.00, 146.80, 140.75, 135.71, 133.70, 130.42, 129.61, 129.45, 128.63, 126.53, 125.78, 123.31,

120.83, 114.91, 110.27, 31.81. m.p. 176 - 178 °C. **HRMS** (ESI) calcd for C<sub>36</sub>H<sub>27</sub>N<sub>2</sub>O<sub>2</sub>S<sub>2</sub> [M + H]<sup>+</sup>: 583.1509, found: 583.1509.

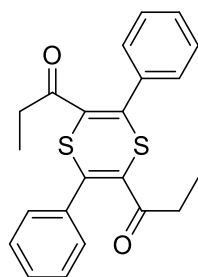

**1,1'-(3,6-diphenyl-1,4-dithiine-2,5-diyl)bis(propan-1-one) (3i)** Following the general procedure, the crude product was purified by column chromatography (PE/EA = 15:1, v/v) to provide the desired compound as a yellow solid (**3i:3i'** = 10:1, 35.4 mg, 62% total yield). m.p. 143 - 145 °C. **<sup>1</sup>H NMR** (600 MHz, CDCl<sub>3</sub>) δ 7.43 - 7.38 (m, 10H), 2.29 - 2.24 (m, 4H), 0.98 - 0.94 (m, 6H). **<sup>13</sup>C NMR** (125 MHz, CDCl<sub>3</sub>) δ 200.28, 149.06, 135.64, 131.15, 130.22, 129.58, 128.81, 35.70, 8.51. **HRMS** (ESI) calcd for C<sub>22</sub>H<sub>20</sub>O<sub>2</sub>S<sub>2</sub>Na [M + Na]<sup>+</sup>: 403.0797, found: 403.0788.

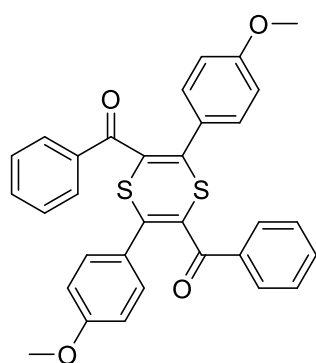

**(3,6-bis(4-methoxyphenyl)-1,4-dithiine-2,5-diyl)bis(phenylmethanone) (3j)** Following the general procedure, the crude product was purified by column chromatography (PE/EA = 10:1, v/v) to provide the desired compound as a yellow solid (**3j:3j'** = 12:1, 74.1 mg, 92% total yield). m.p. 168 - 170 °C. **<sup>1</sup>H NMR** (500 MHz, CDCl<sub>3</sub>) δ 7.84 - 7.81 (m, 4H), 7.52 - 7.49 (m, 2H), 7.38 - 7.34 (m, 4H), 7.30 - 7.26 (m, 4H), 3.67 (s, 6H). **<sup>13</sup>C NMR** (125 MHz, CDCl<sub>3</sub>) δ 192.16, 160.73, 149.07, 135.34, 133.65, 131.32, 129.49, 128.61, 128.26, 127.38, 113.82, 55.19. **HRMS** (ESI) calcd for C<sub>32</sub>H<sub>24</sub>O<sub>4</sub>S<sub>2</sub>Na [M + Na]<sup>+</sup>: 559.1008, found: 559.0999.

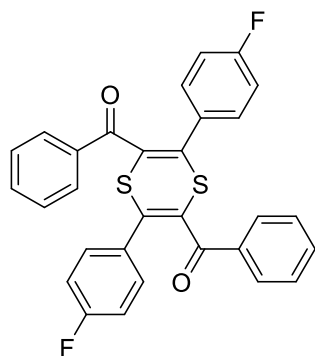

**(3,6-bis(4-fluorophenyl)-1,4-dithiine-2,5-diyl)bis(phenylmethanone) (3k)**

Following the general procedure, the crude product was purified by column chromatography (PE/EA = 10:1, v/v) to provide the desired compound as a yellow solid (**3k:3k'** = 6:1, 66.9 mg, 87% total yield). m.p. 180 - 182 °C. <sup>1</sup>H NMR (500 MHz, CDCl<sub>3</sub>) δ 7.83 - 7.80 (m, 4H), 7.56 - 7.51 (m, 2H), 7.41 - 7.37 (m, 4H), 7.34 - 7.30 (m, 4H), 6.84 - 6.80 (m, 4H). <sup>13</sup>C NMR (125 MHz, CDCl<sub>3</sub>) δ 191.58, 163.4 (d, *J* = 250.0 Hz) 146.70, 135.07, 134.07, 131.71 (d, *J* = 8.75 Hz), 131.00 (d, *J* = 3.75 Hz), 130.57, 129.47, 128.82, 115.67 (d, *J* = 22.5 Hz). HRMS (ESI) calcd for C<sub>30</sub>H<sub>18</sub>F<sub>2</sub>O<sub>2</sub>S<sub>2</sub>Na [M + Na]<sup>+</sup>: 535.0609, found: 535.0603.

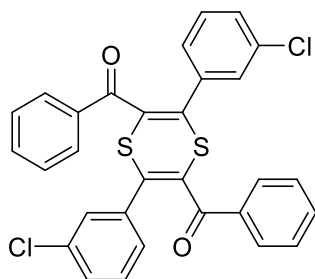

**(3,6-bis(3-chlorophenyl)-1,4-dithiine-2,5-diyl)bis(phenylmethanone) (3l)**

Following the general procedure, the crude product was purified by column chromatography (PE/EA = 13:1, v/v) to provide the desired compound as a yellow solid (**3l:3l'** = 6:1, 76.9 mg, 94% total yield). m.p. 124 - 126 °C. <sup>1</sup>H NMR (600 MHz, CDCl<sub>3</sub>) 7.83-7.80 (m, 4H), 7.57-7.53 (m, 2H), 7.43-7.40 (m, 4H), 7.33-7.31 (m, 2H), 7.22-7.19 (m, 2H), 7.16-7.13 (m, 2H), 7.08-7.05 (m 2H). <sup>13</sup>C NMR (150 MHz, CDCl<sub>3</sub>) δ 191.18, 145.49, 136.53, 135.03, 134.45, 134.17, 131.96, 129.86, 129.70, 129.49, 129.42,

128.86, 127.93. **HRMS** (ESI) calcd for  $C_{30}H_{18}Cl_2O_2S_2Na$   $[M + Na]^+$ : 567.0018, found: 567.0017.

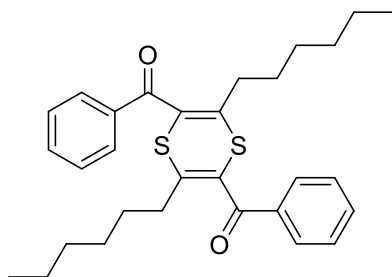

**(3,6-dihexyl-1,4-dithiine-2,5-diyl)bis(phenylmethanone) (3m)** Following the general procedure, the crude product was purified by column chromatography (PE/EA = 20:1, v/v) to provide the desired compound as a yellow oil (55.4 mg, 75%).  **$^1H$  NMR** (500 MHz,  $CDCl_3$ )  $\delta$  7.89 - 7.86 (m, 4H), 7.65 - 7.61 (m, 2H), 7.53 - 7.49 (m, 4H), 2.43 - 2.39 (m, 4H), 1.52 - 1.48 (m, 4H), 1.20 - 1.11 (m, 12H), 0.81 - 0.77 (m, 6H).  **$^{13}C$  NMR** (125 MHz,  $CDCl_3$ )  $\delta$  191.57, 147.80, 135.97, 133.93, 130.71, 129.52, 128.72, 34.99, 31.26, 28.91, 28.63, 22.35, 13.92. **HRMS** (ESI) calcd for  $C_{30}H_{36}O_2S_2Na$   $[M + Na]^+$ : 515.2049, found: 515.2045.

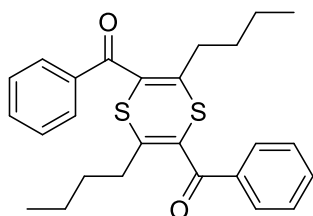

**(3,6-dibutyl-1,4-dithiine-2,5-diyl)bis(phenylmethanone) (3n)** Following the general procedure, the crude product was purified by column chromatography (PE/EA = 20:1, v/v) to provide the desired compound as a yellow oil (43.9 mg, 67%).  **$^1H$  NMR** (500 MHz,  $CDCl_3$ )  $\delta$  7.88 - 7.85 (m, 4H), 7.65 - 7.61 (m, 2H), 7.53 - 7.48 (m, 4H), 2.55 - 2.51 (m, 4H), 1.53 - 1.46 (m, 4H), 1.24 - 1.18 (m, 4H), 0.79 - 0.75 (m, 6H).  **$^{13}C$  NMR** (125 MHz,  $CDCl_3$ )  $\delta$  193.06, 147.99, 135.91, 133.97, 131.39, 129.38, 128.78, 36.75, 31.93, 22.11, 13.64. **HRMS** (ESI) calcd for  $C_{26}H_{28}O_2S_2Na$   $[M + Na]^+$ : 459.1423, found: 459.1418.

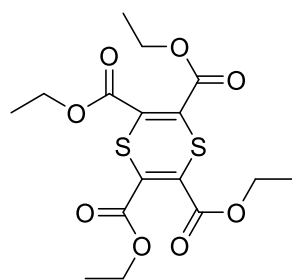

**tetraethyl 1,4-dithiine-2,3,5,6-tetracarboxylate (3o)** Following the general procedure, the crude product was purified by column chromatography (PE/EA = 25:1, v/v) to provide the desired compound as a yellow solid (24.9 mg, 41%). m.p. 114 - 116 °C. **<sup>1</sup>H NMR** (500 MHz, CDCl<sub>3</sub>) δ 7.86 - 7.82 (m, 4H), 7.35 - 7.32 (m, 4H), 7.21 - 7.13 (m, 6H), 7.05 - 7.01 (m, 4H). **<sup>13</sup>C NMR** (125 MHz, CDCl<sub>3</sub>) δ 190.08, 167.01, 164.97, 147.78, 134.82, 132.16, 132.08, 131.50, 131.48, 130.27, 129.90, 129.56, 128.53, 116.04, 115.86. **HRMS** (ESI) calcd for C<sub>16</sub>H<sub>20</sub>O<sub>8</sub>S<sub>2</sub>Na [M + Na]<sup>+</sup>: 427.0492, found: 427.0485.

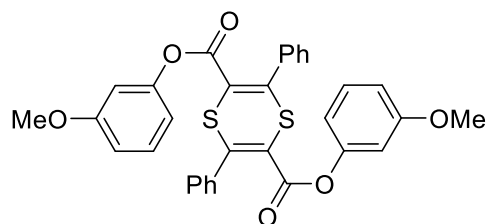

**bis(3-methoxyphenyl) 3,6-diphenyl-1,4-dithiine-2,5-dicarboxylate (3p)** Following the general procedure, the crude product was purified by column chromatography (PE/EA = 10:1, v/v) to provide the desired compound as a yellow solid (**3p:3p'** = 6:1, 64.2 mg, 75% total yield). m.p. 128 - 130 °C. **<sup>1</sup>H NMR** (500 MHz, CDCl<sub>3</sub>) δ 7.59-7.56 (m, 4H), 7.45-7.41 (m, 6H), 7.26-7.18 (m, 2H), 6.75-6.72 (m, 2H), 6.54-6.51 (m, 2H), 6.41-6.39 (m, 2H), 3.74 (s, 6H). **<sup>13</sup>C NMR** (125 MHz, CDCl<sub>3</sub>) δ 161.29, 160.33, 155.25, 151.15, 135.82, 130.18, 129.71, 129.53, 128.58, 120.42, 113.15, 111.97, 106.89, 55.42. **HRMS** (ESI) calcd for C<sub>32</sub>H<sub>24</sub>O<sub>6</sub>S<sub>2</sub>Na [M + Na]<sup>+</sup>: 591.0907, found: 591.0913.

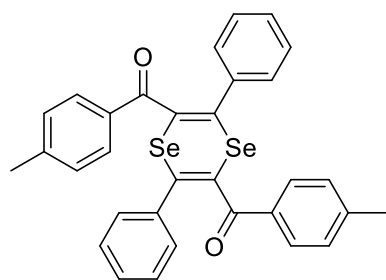

**(3,6-diphenyl-1,4-diselenine-2,5-diyl)bis(p-tolylmethanone) (4a)** Following the general procedure, the crude product was purified by column chromatography (PE/EA = 9:1, v/v) to provide the desired compound as a yellow solid (**4a:4a'** = 10:1, 82.6 mg, 92% total yield). m.p. 158 - 160 °C. <sup>1</sup>H NMR (500 MHz, CDCl<sub>3</sub>) δ 7.73 - 7.71 (m, 4H), 7.37 - 7.34 (m, 4H), 7.17 - 7.10 (m, 10H), 2.36 (s, 6H). <sup>13</sup>C NMR (125 MHz, CDCl<sub>3</sub>) δ 193.09, 147.02, 144.81, 136.92, 132.43, 131.90, 129.85, 129.61, 129.38, 129.24, 128.32, 21.74. HRMS (ESI) calcd for C<sub>32</sub>H<sub>24</sub>O<sub>2</sub>Se<sub>2</sub>Na [M + Na]<sup>+</sup>: 622.9999, found: 622.9994.

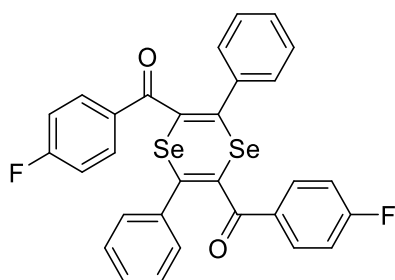

**(3,6-diphenyl-1,4-diselenine-2,5-diyl)bis((4-fluorophenyl)methanone) (4b)**

Following the general procedure, the crude product was purified by column chromatography (PE/EA = 12:1, v/v) to provide the desired compound as a yellow solid (**4b:4b'** = 7:1, 74.6 mg, 82% total yield). m.p. 136 - 138 °C. <sup>1</sup>H NMR (500 MHz, CDCl<sub>3</sub>) δ 7.83 - 7.79 (m, 4H), 7.35 - 7.32 (m, 4H), 7.20 - 7.11 (m, 6H), 7.04 - 6.99 (m, 4H). <sup>13</sup>C NMR (125 MHz, CDCl<sub>3</sub>) δ 191.78, 165.99 (d, *J* = 255.0 Hz), 148.27, 136.72, 132.05 (d, *J* = 8.75 Hz), 131.38 (d, *J* = 3.75 Hz), 131.26, 129.79, 129.63, 128.51, 115.92 (d, *J* = 22.5 Hz). HRMS (ESI) calcd for C<sub>30</sub>H<sub>18</sub>F<sub>2</sub>O<sub>2</sub>Se<sub>2</sub>Na [M + Na]<sup>+</sup>: 630.9498, found: 630.9492.

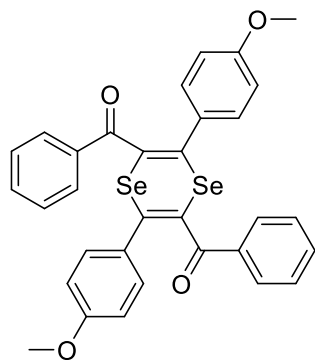

**(3,6-bis(4-methoxyphenyl)-1,4-diselenine-2,5-diyl)bis(phenylmethanone) (4c)**

Following the general procedure, the crude product was purified by column chromatography (PE/EA = 8:1, v/v) to provide the desired compound as a yellow solid (**4c:4c'** = 9:1, 73.8 mg, 78% total yield). m.p. 170 - 172 °C. <sup>1</sup>H NMR (500 MHz, CDCl<sub>3</sub>) δ 7.82-7.79 (m, 4H), 7.49-7.46 (m, 2H), 7.37-7.33 (m, 4H), 7.30-7.27 (m, 4H), 6.63-6.60 (m, 4H), 3.66 (s, 6H). <sup>13</sup>C NMR (125 MHz, CDCl<sub>3</sub>) δ 193.78, 160.40, 149.11, 135.06, 133.57, 131.46, 129.52, 129.40, 129.27, 128.56, 113.73, 55.18. HRMS (ESI) calcd for C<sub>32</sub>H<sub>24</sub>O<sub>4</sub>Se<sub>2</sub>Na [M + Na]<sup>+</sup>: 654.9897, found: 654.9891.

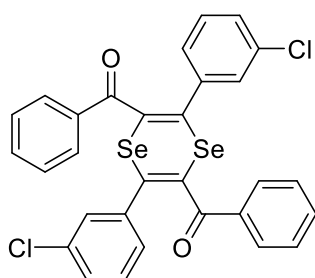

**(3,6-bis(3-chlorophenyl)-1,4-diselenine-2,5-diyl)bis(phenylmethanone) (4d)**

Following the general procedure, the crude product was purified by column chromatography (PE/EA = 8:1, v/v) to provide the desired compound as a yellow solid (**4d:4d'** = 3:1, 72.9 mg, 76% total yield). m.p. 156 - 158 °C. <sup>1</sup>H NMR (500 MHz, CDCl<sub>3</sub>) δ 7.81 - 7.78 (m, 4H), 7.55 - 7.51 (m, 2H), 7.42 - 7.38 (m, 4H), 7.34 - 7.32 (m, 2H), 7.23 - 7.20 (m, 2H), 7.06 - 7.02 (m, 2H). <sup>13</sup>C NMR (125 MHz, CDCl<sub>3</sub>) δ 192.72, 145.93, 138.27, 134.78, 134.25, 134.03, 132.87, 129.60, 129.59, 129.49, 129.24, 128.76, 127.99. HRMS (ESI) calcd for C<sub>30</sub>H<sub>18</sub>Cl<sub>2</sub>O<sub>2</sub>Se<sub>2</sub>Na [M + Na]<sup>+</sup>: 662.8907, found: 662.8899.

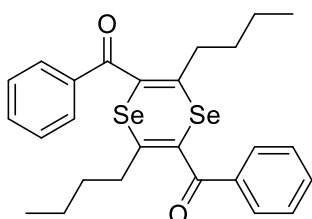

**(3,6-dibutyl-1,4-diselenine-2,5-diyl)bis(phenylmethanone) (4f)** Following the general procedure, the crude product was purified by column chromatography (PE/EA

= 15:1, v/v) to provide the desired compound as a yellow oil (39.0 mg, 49%). **<sup>1</sup>H NMR** (500 MHz, CDCl<sub>3</sub>) δ 7.88 - 7.85 (m, 4H), 7.65 - 7.61 (m, 2H), 7.53 - 7.48 (m, 4H), 2.55 - 2.51 (m, 4H), 1.53 - 1.46 (m, 4H), 1.24 - 1.18 (m, 4H), 0.79 - 0.75 (m, 6H). **<sup>13</sup>C NMR** (125 MHz, CDCl<sub>3</sub>) δ 193.06, 147.99, 135.91, 133.97, 131.39, 129.38, 128.78, 36.75, 31.93, 22.11, 13.64. **HRMS** (ESI) calcd for C<sub>26</sub>H<sub>28</sub>O<sub>2</sub>Se<sub>2</sub>Na [M + Na]<sup>+</sup>: 555.0312, found: 555.0317.

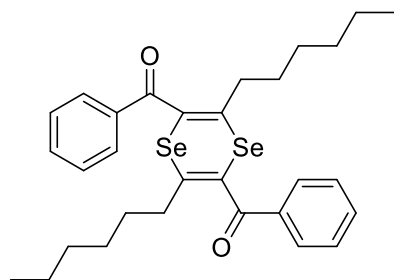

**(3,6-dihexyl-1,4-diselenine-2,5-diyl)bis(phenylmethanone) (4g)** Following the general procedure, the crude product was purified by column chromatography (PE/EA = 15:1, v/v) to provide the desired compound as a yellow oil (59.8 mg, 68%). **<sup>1</sup>H NMR** (500 MHz, CDCl<sub>3</sub>) δ 7.89 - 7.86 (m, 4H), 7.63 - 7.61 (m, 2H), 7.52 - 7.48 (m, 4H), 2.55 - 2.51 (m, 4H), 1.52 - 1.48 (m, 4H), 1.20 - 1.10 (m, 12H), 0.81 - 0.77 (m, 6H). **<sup>13</sup>C NMR** (125 MHz, CDCl<sub>3</sub>) δ 193.01, 148.00, 135.91, 133.94, 131.37, 129.37, 128.75, 36.97, 31.25, 29.77, 28.59, 22.33, 13.92. **HRMS** (ESI) calcd for C<sub>30</sub>H<sub>36</sub>O<sub>2</sub>Se<sub>2</sub>Na [M + Na]<sup>+</sup>: 611.0938, found: 611.0936.



### 3.4 Further transformations of 3a

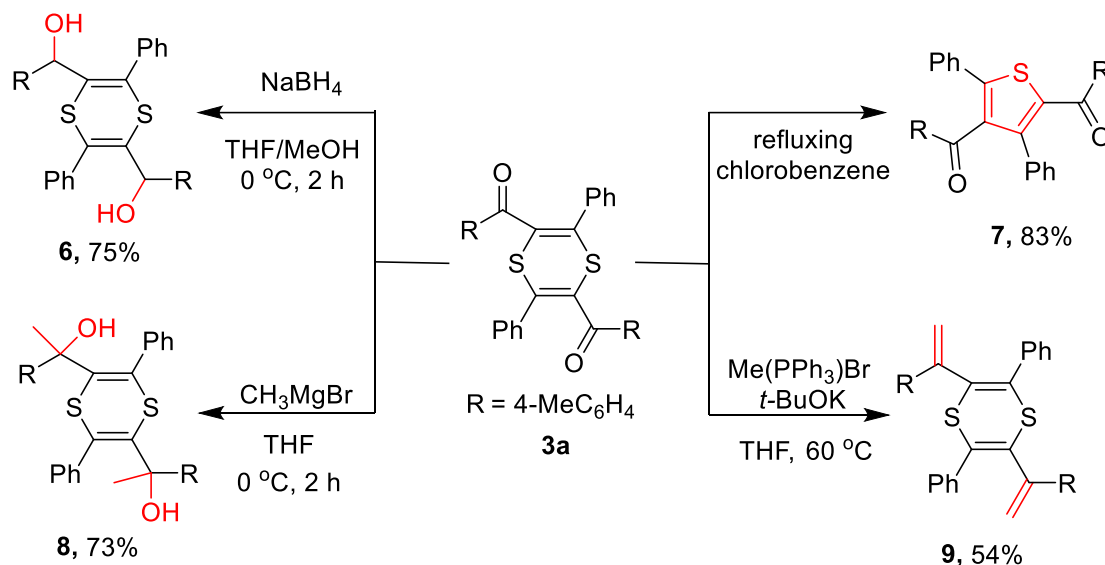

Procedure for preparation of **6**<sup>10</sup>: To an oven-dried 10 mL Schlenk tube charged with a PTFE-coated magnetic stirring bar, **3a** (0.2 mmol, 1.0 equiv., 100.9 mg) are diluted in dry THF and methanol (THF: MeOH=1:1, v: v) at 0 °C. NaBH<sub>4</sub> (0.6 mmol, 3.0 equiv., 22.7 mg) was added to the reaction vessel, and the reaction was stirred for 2 h at 0 °C under N<sub>2</sub> atmosphere. Upon the completion of reaction monitored by TLC, and the reaction was quenched with water, and the aqueous layer was extracted with ethyl acetate (3x10 mL). The combined organic layers were washed with brine (10 mL), dried over MgSO<sub>4</sub>, and concentrated under reduced pressure, the pure product was isolated by column chromatography on silica gel (PE: EA = 7: 1, v: v) as white solid. (76.0 mg, 75%)

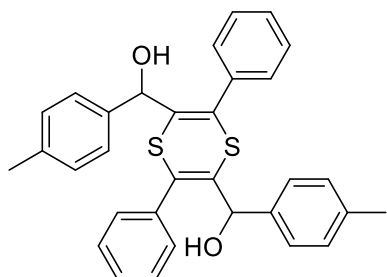

<sup>1</sup>H NMR (500 MHz, CDCl<sub>3</sub>) δ 7.27 - 7.25 (m, 10H), 7.17 - 7.10 (m, 8H), 5.66 - 5.63 (m, 2H), 2.50 - 2.48 (m, 2H), 2.35 (s, 6H). <sup>13</sup>C NMR (125 MHz, CDCl<sub>3</sub>) δ 140.09,

138.80, 138.52, 137.46, 136.82, 129.33, 129.08, 128.58, 128.43, 125.95, 72.39, 21.07. m.p. 105 - 107 °C. **HRMS** (ESI) calcd for C<sub>32</sub>H<sub>28</sub>O<sub>2</sub>S<sub>2</sub>Na [M + Na]<sup>+</sup>: 531.1423, found: 531.1428.

Procedure for preparation of **7**<sup>11</sup>: To a 10 mL sealed tube charged with a PTFE-coated magnetic stirring bar and **3a** (0.2 mmol, 1.0 equiv., 100.9 mg) The reaction was carried out in refluxing chlorobenzene (2 mL) for 1 h. Upon the completion of reaction monitored by TLC, and the reaction was quenched with water, and the aqueous layer was extracted with ethyl acetate (3x10 mL). The combined organic layers were washed with brine (10 mL), dried over MgSO<sub>4</sub>, and concentrated under reduced pressure, the pure product was isolated by column chromatography on silica gel (PE: EA = 6: 1, v: v) as yellow solid. (78.5 mg, 83%)

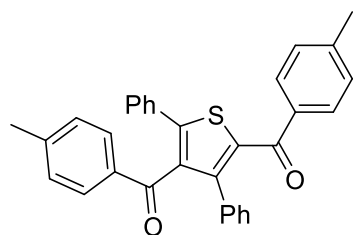

<sup>1</sup>H NMR (500 MHz, CDCl<sub>3</sub>) δ 7.57-7.47 (m, 6H), 7.30-7.25 (m, 3H), 7.10-7.07 (m, 2H), 7.01-6.95 (m, 7H), 2.26 (s, 3H), 2.24 (s, 3H). <sup>13</sup>C NMR (125 MHz, CDCl<sub>3</sub>) δ 194.39, 189.49, 146.92, 145.41, 144.37, 143.20, 138.74, 137.51, 134.67, 134.58, 134.21, 132.29, 129.78, 129.75, 129.71, 129.00, 128.97, 128.78, 128.65, 128.50, 127.70, 127.60, 21.57, 21.49. m.p. 177 - 179 °C. **HRMS** (ESI) calcd for C<sub>32</sub>H<sub>24</sub>O<sub>2</sub>SNa [M + Na]<sup>+</sup>: 495.1389, found: 495.1382.

Procedure for preparation of **8**<sup>12</sup>: To an oven-dried 10 mL Schlenk tube charged with a PTFE-coated magnetic stirring bar, **3a** (0.2 mmol, 1.0 equiv., 100.9 mg) are diluted in dry THF (2 mL) at 0 °C. methylmagnesium bromide solution (3.0 M in THF, 0.27 mL, 0.8 mmol) was added to the reaction vessel, and the reaction was stirred for 2 h at 0 °C under N<sub>2</sub> atmosphere. Upon the completion of reaction monitored by TLC, and the reaction was quenched with water, and the aqueous layer was extracted with ethyl acetate (3x10 mL). The combined organic layers were washed with brine (10 mL), dried

over MgSO<sub>4</sub>, and concentrated under reduced pressure, the pure product was isolated by column chromatography on silica gel (PE: EA = 7: 1, v: v) as white solid. (78.4 mg, 73%)

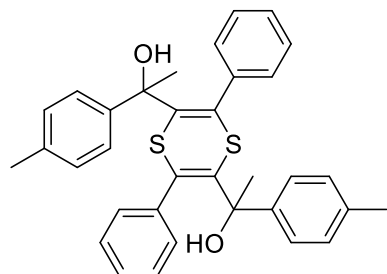

<sup>1</sup>H NMR (500 MHz, CDCl<sub>3</sub>) δ 7.26-7.17 (m, 10 H), 7.13-7.11 (m, 4H), 6.96-6.93 (m, 4H), 2.55 (s, 2H), 2.36 (s, 6H). <sup>13</sup>C NMR (125 MHz, CDCl<sub>3</sub>) δ 145.41, 143.64, 138.49, 137.45, 137.08, 128.83, 128.14, 127.91, 125.35, 78.36, 30.13, 21.03. m.p. 78 - 80 °C. HRMS (ESI) calcd for C<sub>34</sub>H<sub>32</sub>O<sub>2</sub>S<sub>2</sub>Na [M + Na]<sup>+</sup>: 559.1736, found: 559.1731.

Procedure for preparation of **9**<sup>13</sup>: To an oven-dried 10 mL Schlenk tube charged with a PTFE-coated magnetic stirring bar, Ph<sub>3</sub>PMeBr (4.0 equiv., 142.9 mg, 0.4 mmol) was added. Under nitrogen atmosphere, 2 mL of tetrahydrofuran and of *t*-BuOK (4.0 equiv., 44.9 mg, 0.4mmol) were added at 0 °C. After 1 h, **3a** (1.0 equiv., 0.1 mmol, 50.5 mg) was added at 80 °C for 4 h. Upon the completion of reaction monitored by TLC, and the reaction was quenched with water, and the aqueous layer was extracted with ethyl acetate (3x10 mL). The combined organic layers were washed with brine (10 mL), dried over MgSO<sub>4</sub>, and concentrated under reduced pressure, the pure product was isolated by column chromatography on silica gel (PE: EA = 10: 1, v: v) as white solid. (29.0 mg, 58%).

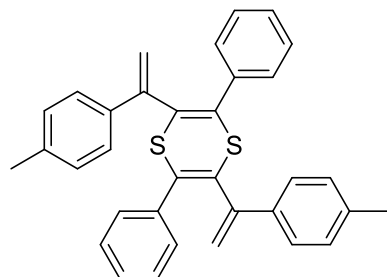

<sup>1</sup>H NMR (500 MHz, CDCl<sub>3</sub>) δ 7.36-7.34 (m, 4H), 7.32-7.29 (m, 4H), 7.15-7.12 (m, 10H), 5.58 (m, 2H), 5.14 (s, 2H), 2.35 (s, 6H). <sup>13</sup>C NMR (150 MHz, CDCl<sub>3</sub>) δ 145.22, 140.13, 138.11, 137.22, 135.52, 134.60, 129.27, 129.17, 127.92, 127.85, 126.44, 116.65, 21.19. m.p. 118 - 120 °C. HRMS (ESI) calcd for C<sub>34</sub>H<sub>29</sub>S<sub>2</sub> [M + H]<sup>+</sup>: 501.1705, found: 501.1709.

### 3.5 Gram-scale experiment

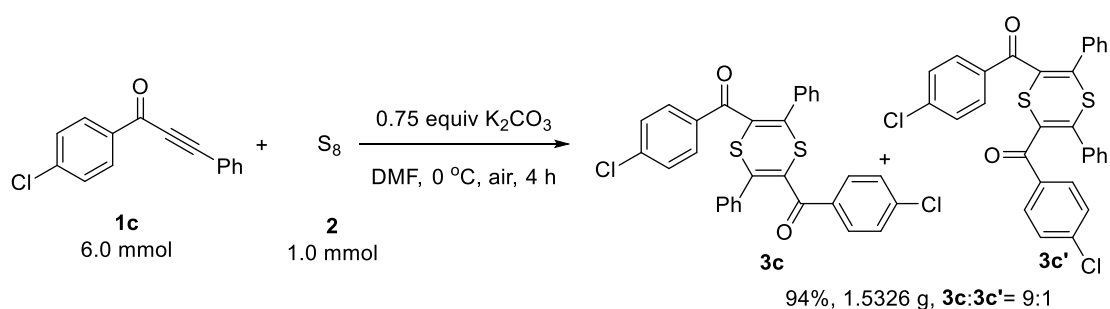

In a schlenk tube **1a** (6.0 mmol, 1.4441 g), **2** (1.0 mmol, 256.5 mg), K<sub>2</sub>CO<sub>3</sub> (4.5 mmol, 621.9 mg) and DMF (60.0 mL) were stirred at 0 °C. After the reaction was completed as monitored by thin-layer chromatography, the reaction mixture was then quenched by water, and the water layers were extracted with ethyl acetate (20 mL × 3). The combined organic layers were washed with brine, dried over anhydrous Na<sub>2</sub>SO<sub>4</sub>, filtered, and concentrated under reduced pressure. Purification by chromatography on silica gel (petroleum ether/ethyl acetate = 12:1) afforded desired compound as a yellow solid (**3c:3c'** = 9:1, 1.5326 g, 94% total yield)

#### 4. References

- [1] Yuan, Y.; Tan, H.; Kong, L.; Zheng, Z.; Xu, M.; Huang, J.; Li, Y. Transition-metal-free C–C  $\sigma$ -bond activation of  $\alpha$ -aryl ketones and subsequent Zn-catalyzed intramolecular cyclization: synthesis of tetrasubstituted furans. *Org. Biomol. Chem.* **2019**, *17*, 2725-2733.
- [2] Wang, M.; Kong, L.; Wang, Y.; Song, B.; Sun, Y.; Tang, R.; Li, Y.; Sequential C–C  $\sigma$ -Bond Cleavage/(sp<sup>2</sup>) C–O Bond Formation via C–H Functionalization toward Pyranoindolones Fused with Medium-Sized Ring. *Org. Lett.* **2018**, *20*, 6130-6134.
- [3] Kotipalli R.; Nagireddy A.; Reddy M. S. Palladium-catalyzed cyclizative cross coupling of ynone oximes with 2-haloaryl N-acrylamides for isoxazolyl indoline bis-heterocycles. *Org. Biomol. Chem.*, **2022**,*20*, 2609-2614.
- [4] Chan, K. H.; Leong, W. K.; Jaouen, G.; Leclercq, L.; Top, S.; Vessières, A., Organometallic cluster analogues of tamoxifen: Synthesis and biochemical assay. *J. Organomet. Chem.* **2006**, *691*, 9-19.
- [5] Wang, M.; Yin, L.; Cheng, L.; Yang, Y.; Li, Y., Straightforward Stereoselective Synthesis of Seven-Membered Oxa-Bridged Rings through In Situ Generated Cycloheptenol Derivatives, *J. Org. Chem.*, **2021**, *86*, 12956-12963.
- [6] Zhou, F.; Li, C.; Li, M.; Jin, Y.; Jiang, H.; Zhang, Y.; Wu, W., Synthesis of 2-isoxazolyl-2,3-dihydrobenzofurans via palladium-catalyzed cascade cyclization of alkenyl ethers, *Chem. Commun.*, **2021**,*57*, 4799-4802
- [7] Karabiyikoglu S.; Kelgokmen Y.; Zora M., Facile synthesis of iodopyridines from N-propargylic  $\beta$ -enaminones via iodine-mediated electrophilic cyclization, *Tetrahedron* **2015**, *71*, 4324-4333.
- [8] Li, H.; Liu, S.; Huang, Y.; Xu, X.; F. Qing, Tandem Trifluoromethylthiolation/Aryl Migration of Aryl Alkynoates to Trifluoromethylthiolated Alkenes, *Chem. Commun.*, **2017**, *53*, 10136-10139.
- [9] Jatuporn M.; Praewpan K.; Chayaporn P.; Manat P.; Vichai R.; Darunee S.; Chutima K., Iodine-catalyzed Sulfonylation of Arylacetylenic Acids and Arylacetylenes with Sodium Sulfinates: Synthesis of Arylacetylenic Sulfones, *J. Org. Chem.*, **2016**, *81*, 2744–2752.
- [10] Zhou, X. B.; Zhang, G. Y.; Huang, R. B.; Huang, H. M., Palladium-Catalyzed Allyl–Allyl Reductive Coupling of Allylamines or Allylic Alcohols with H<sub>2</sub> as Sole Reductant, *Org. Lett.*, **2021**, *23*, 365-369.
- [11] Nakayama, J.; Yomoda, R.; Hoshino, M., Reactions of Elemental Sulfur and Selenium with some Acetylenic compounds Formation of Thiophenes and Selenophenes, *Heterocycles*, **1987**, *26*, 2215-2222.
- [12] Hatano, M.; Suzuki, S.; Ishihara, K., Highly Efficient Alkylation to Ketones and Aldimines with Grignard Reagents Catalyzed by Zinc(II) Chloride, *J. Am. Chem. Soc.* **2006**, *128*, 9998–9999
- [13] Conner, M. L.; Brown, M. K., Synthesis of 1,3-Substituted Cyclobutanes by Allenoate-Alkene [2 + 2] Cycloaddition, *J. Org. Chem.* **2016**, *81*, 8050–8060.

## 5. Copies of NMR spectra

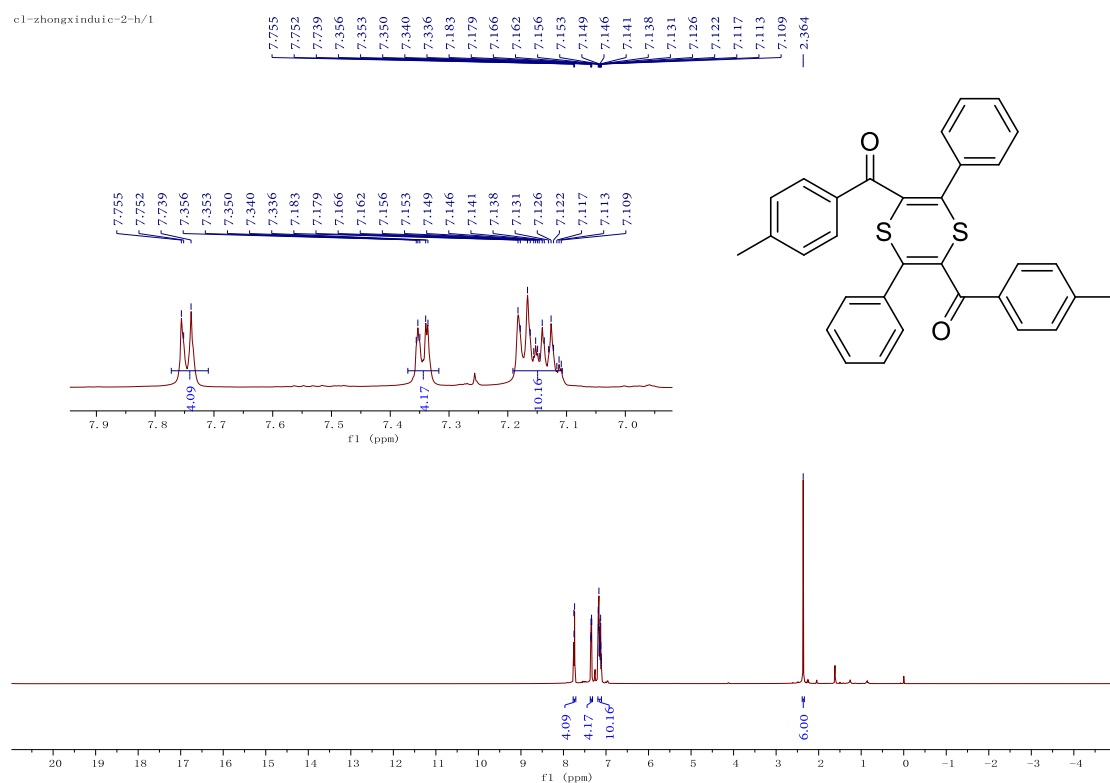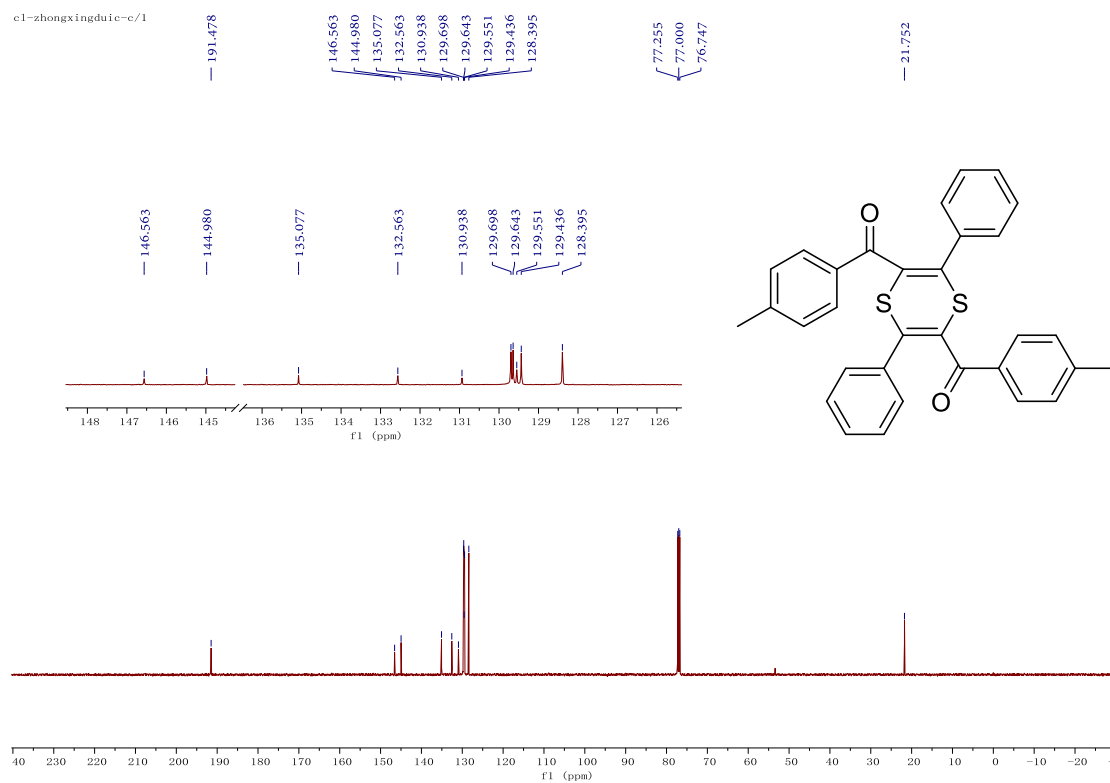

c1-03-077-h.1.fid

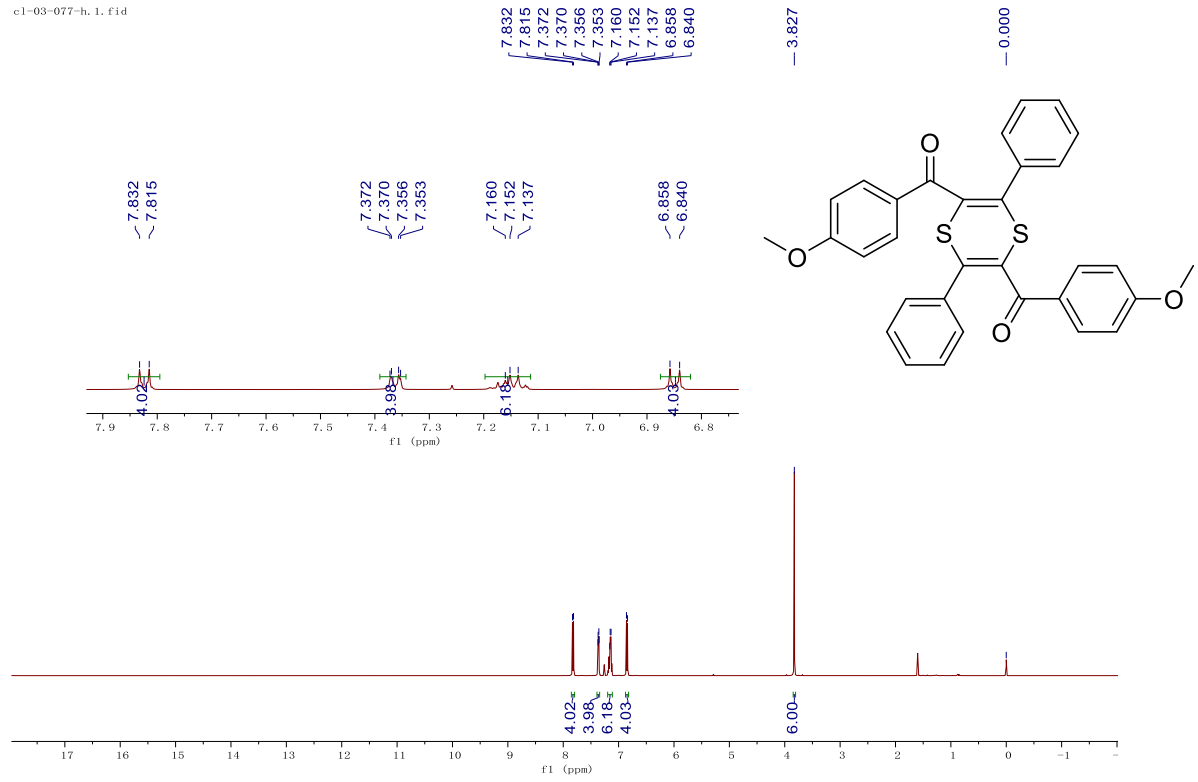

c1-03-077-e.1.fid

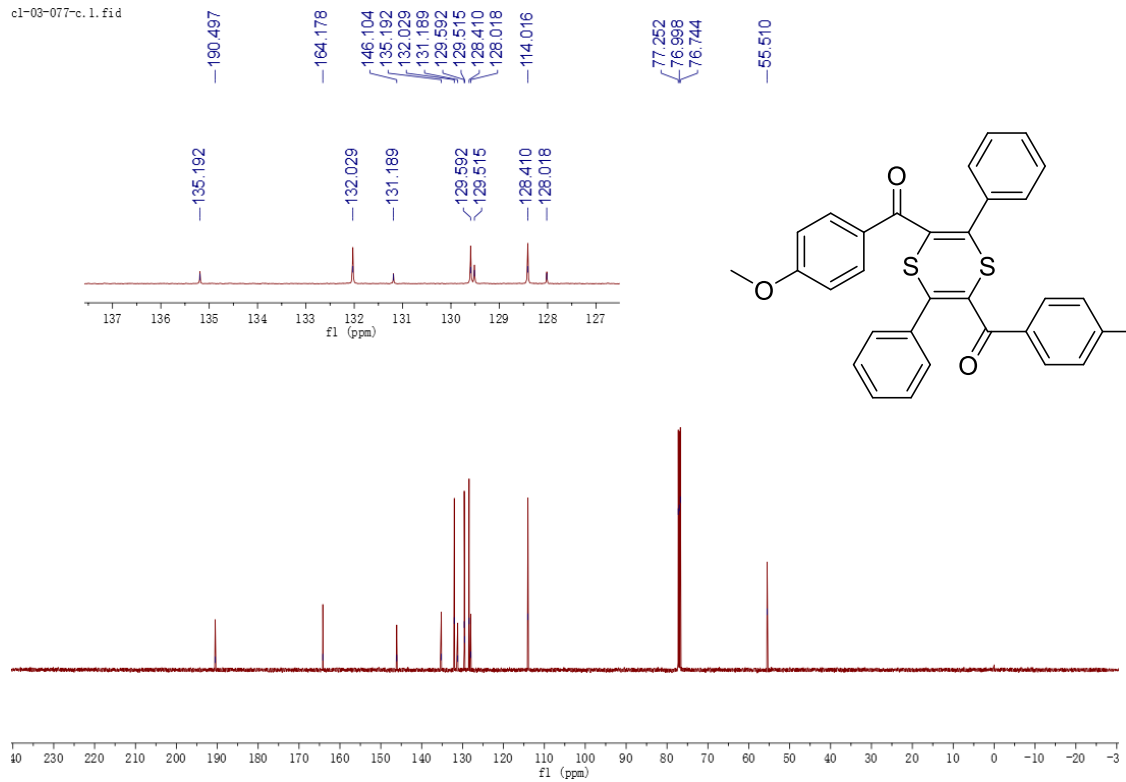

c1-03-013-1-h.1.fid

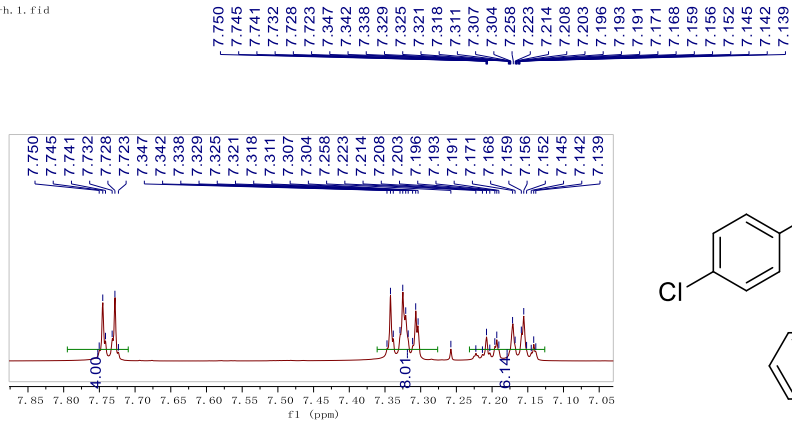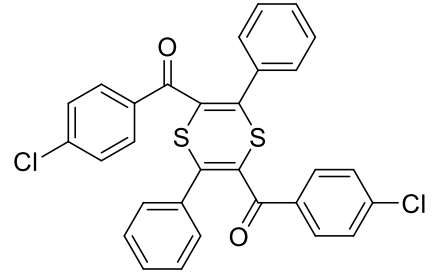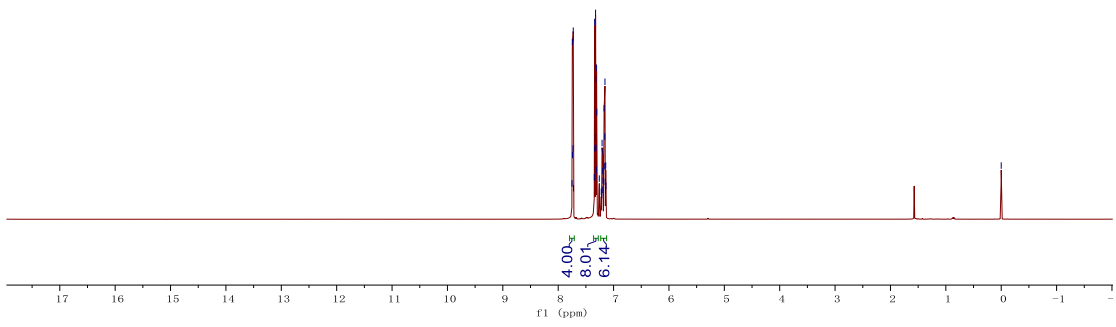

c1-03-013-1-e.1.fid

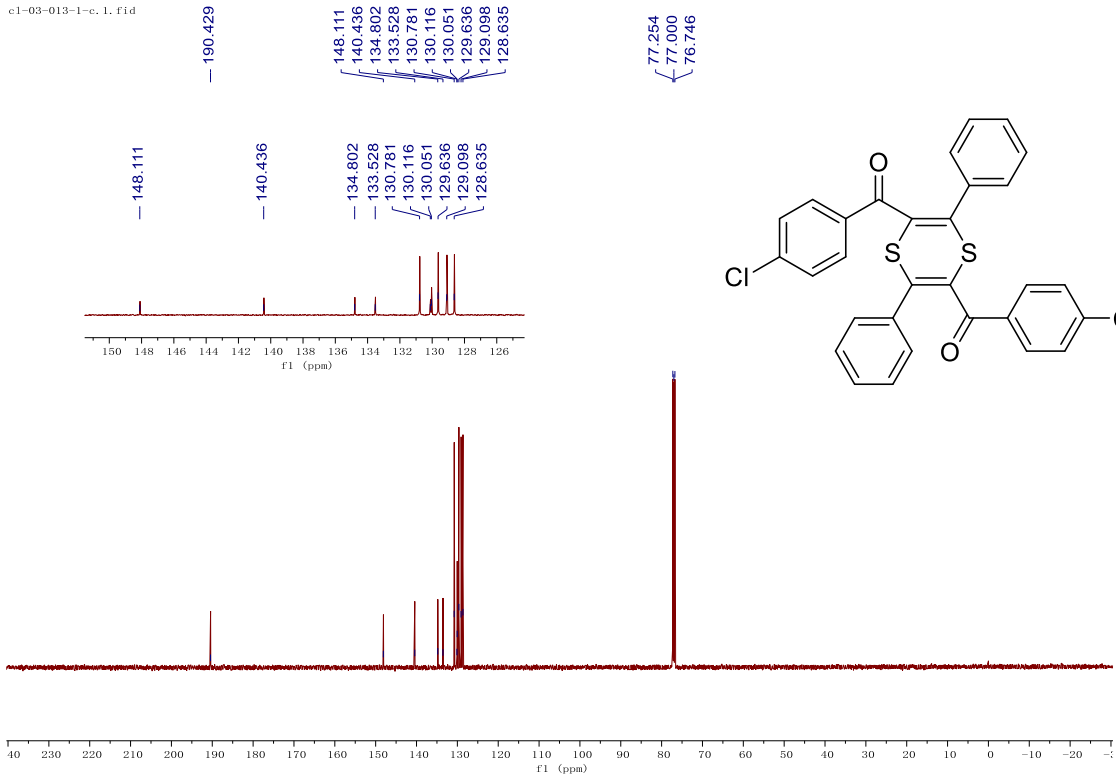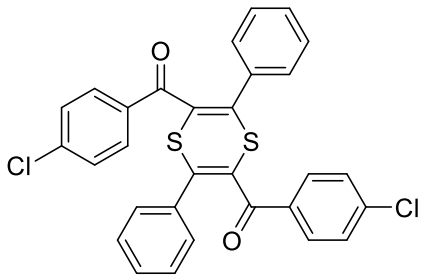







c1-04-078-h, 1.fid

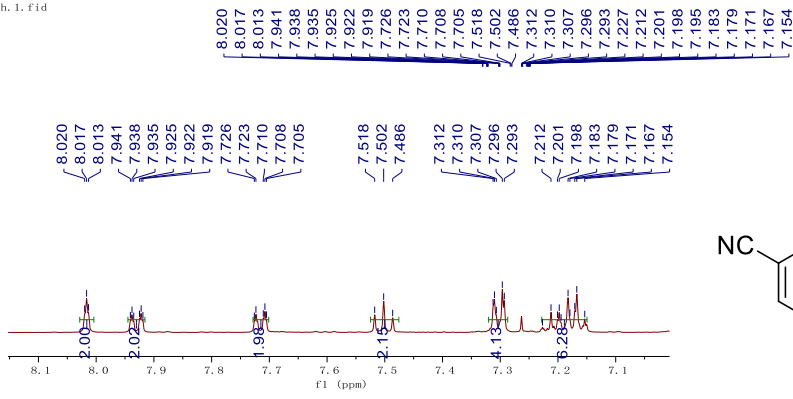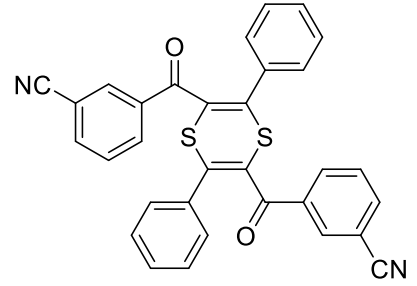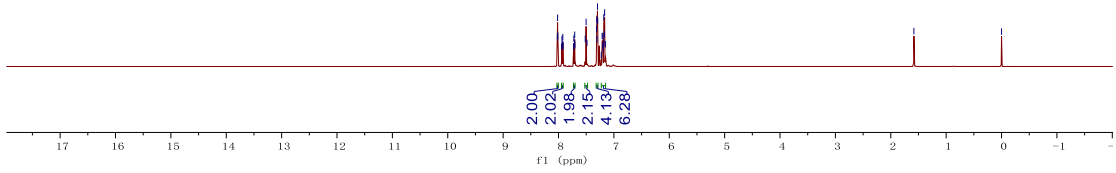

c1-04-078-c, 1.fid

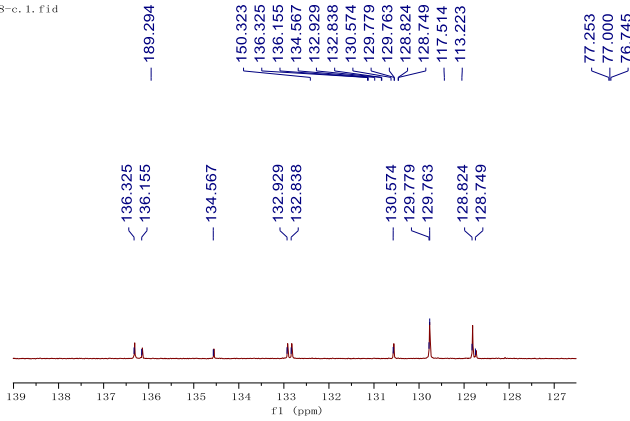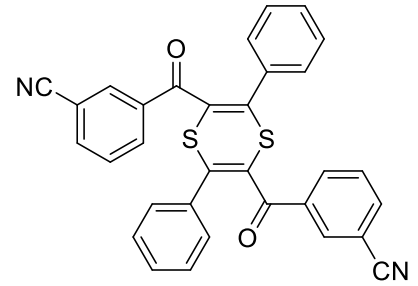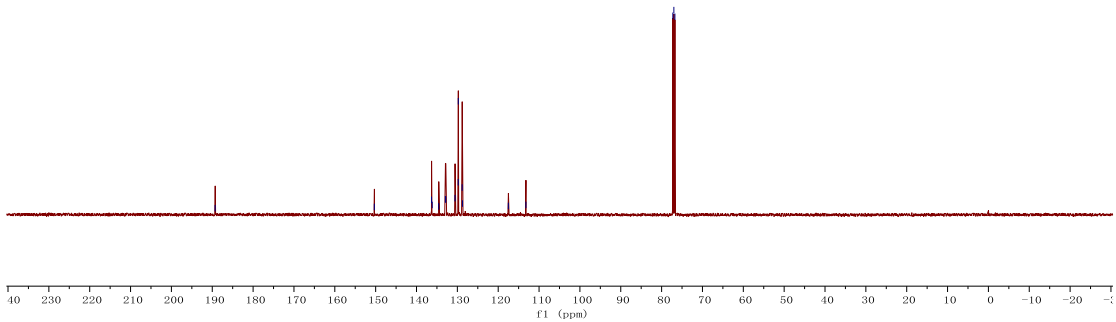

c1-03-018-1-h.1.fid

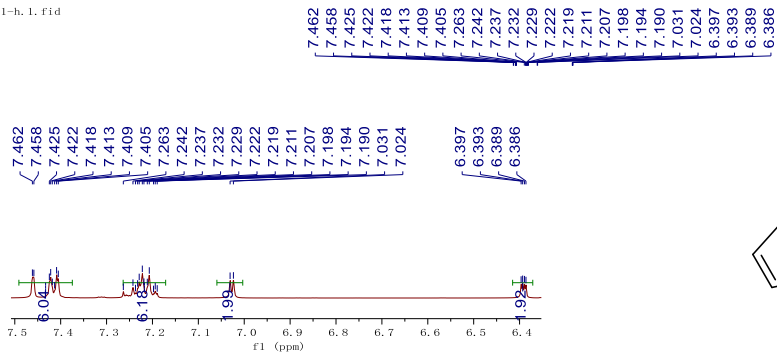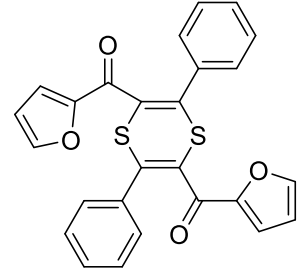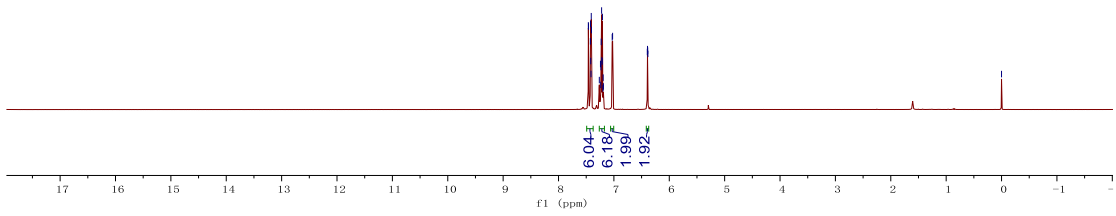

c1-03-018-1-e.1.fid

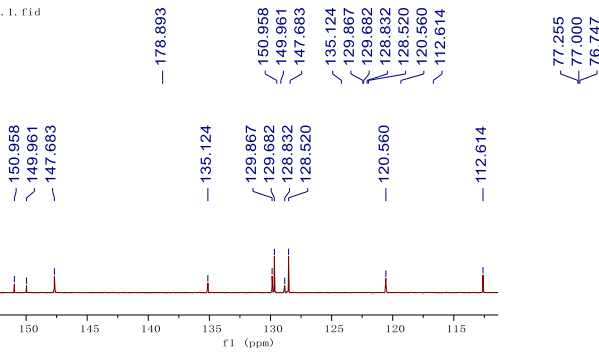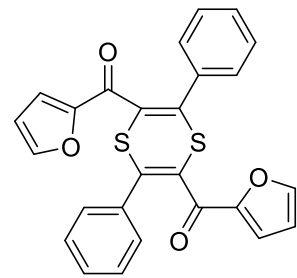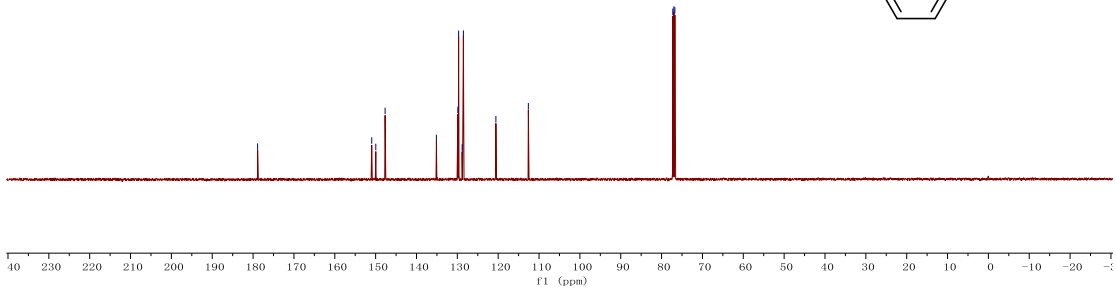

c1-1-24-h. 1. fid

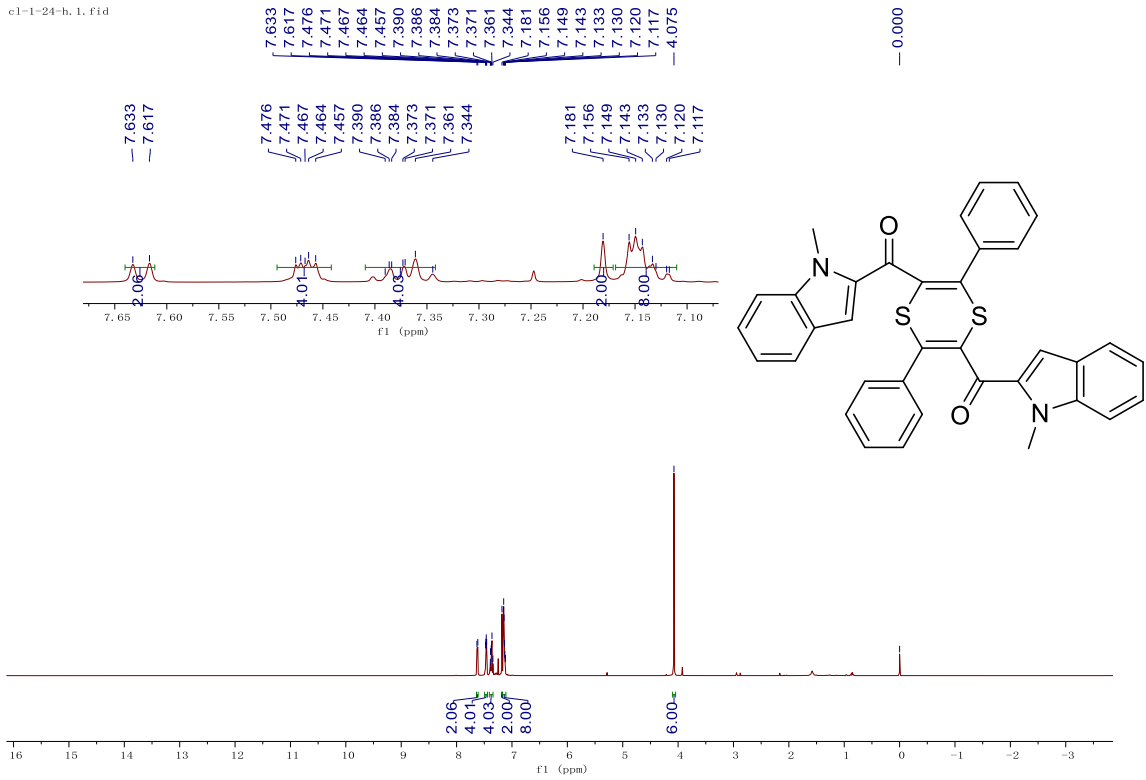

c1-1-24-C. 1. fid

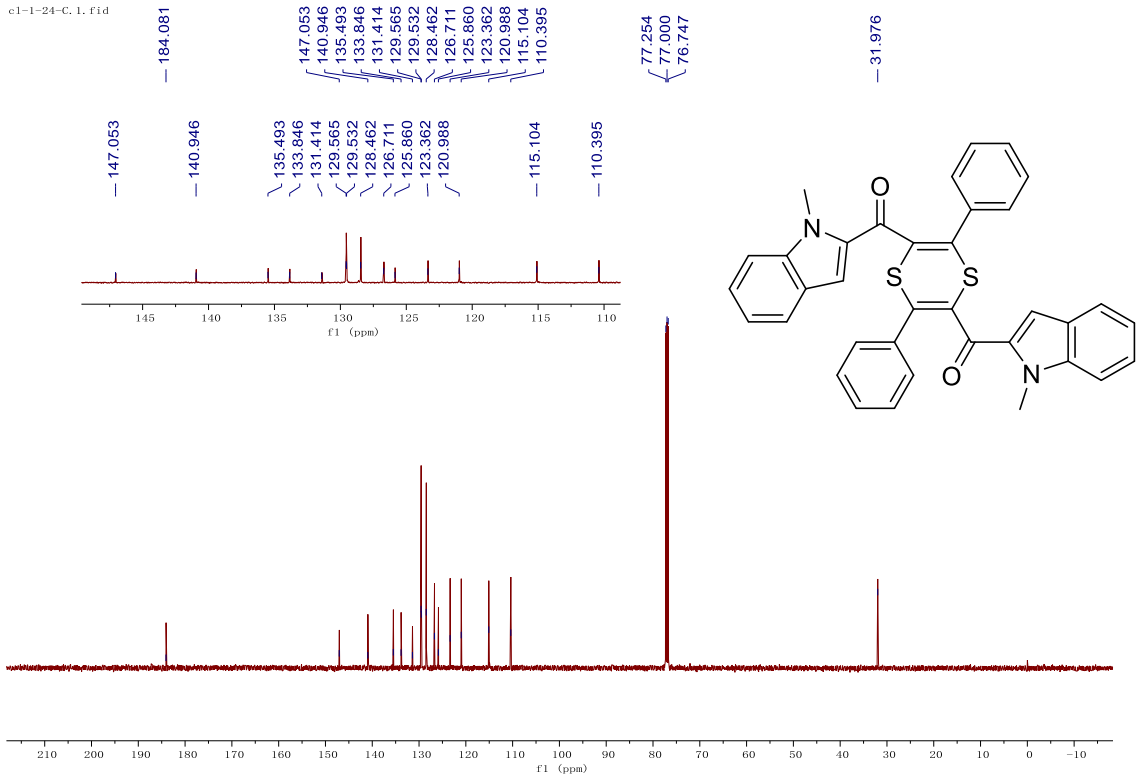

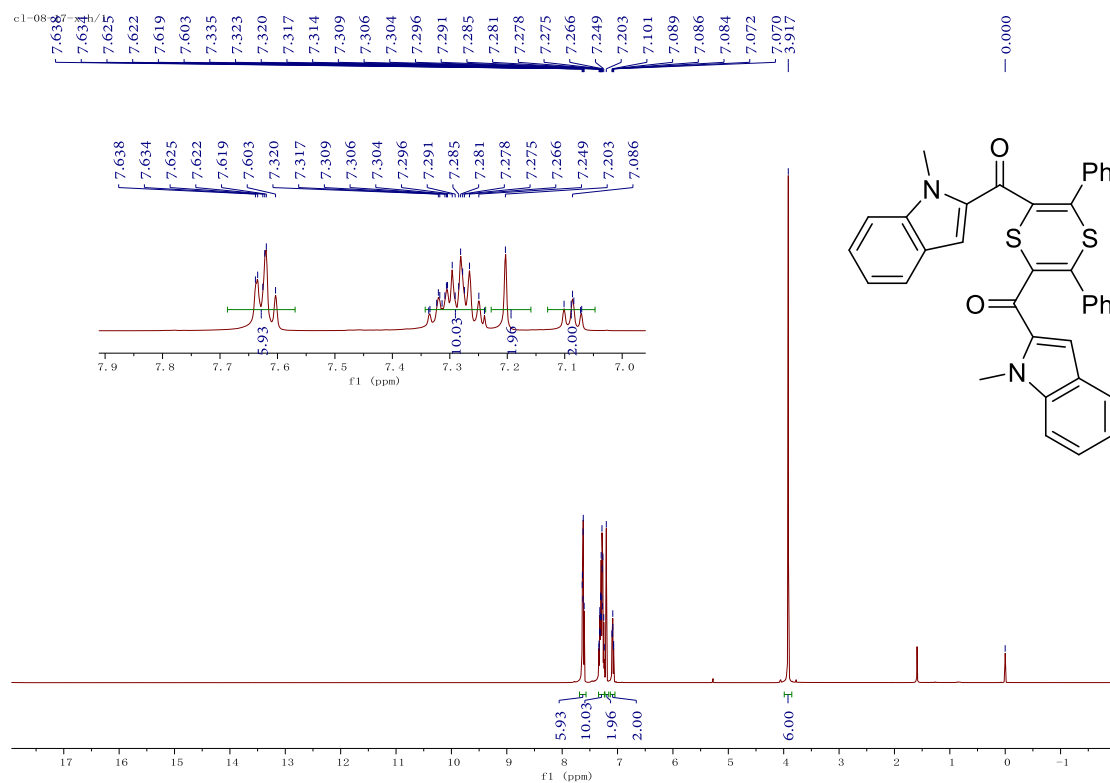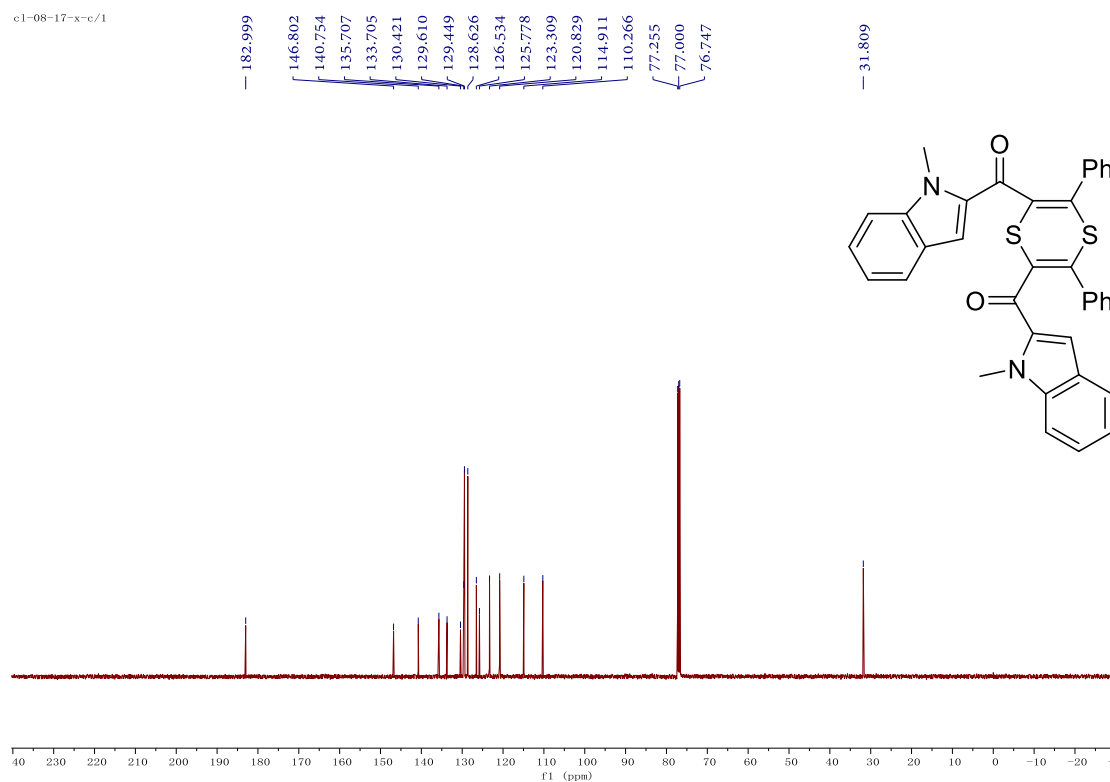

c1-05-066-h, 10, fid

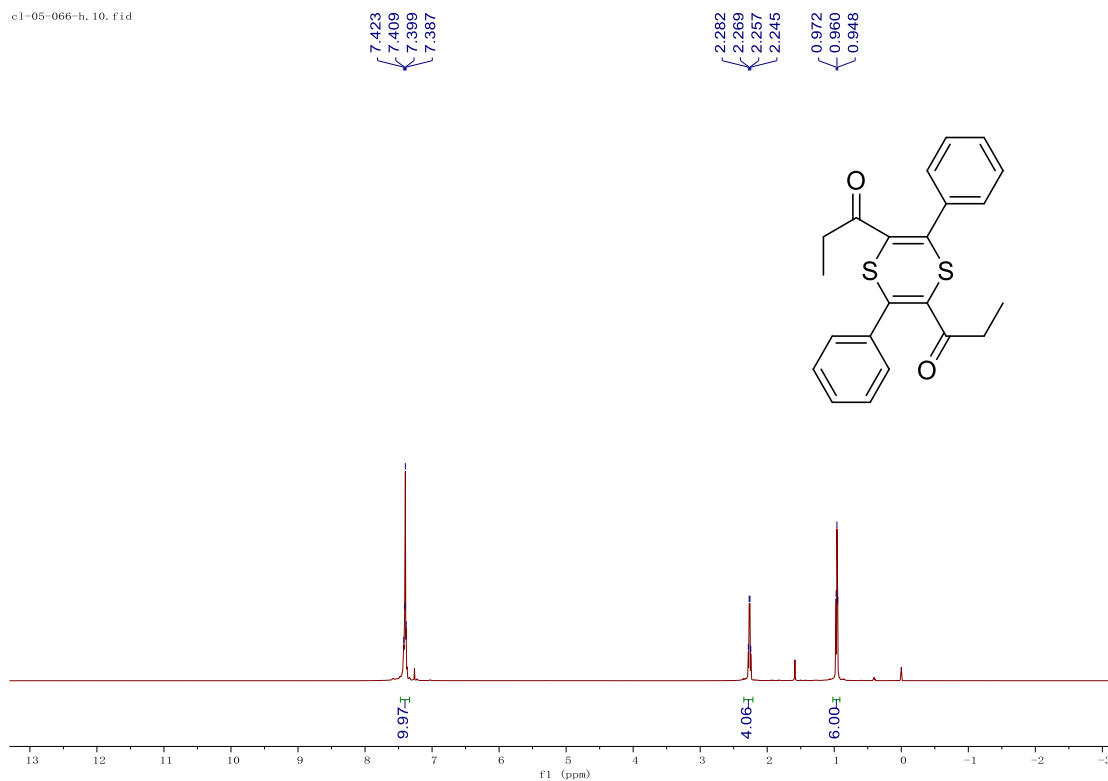

c1-05-066-c-500/1

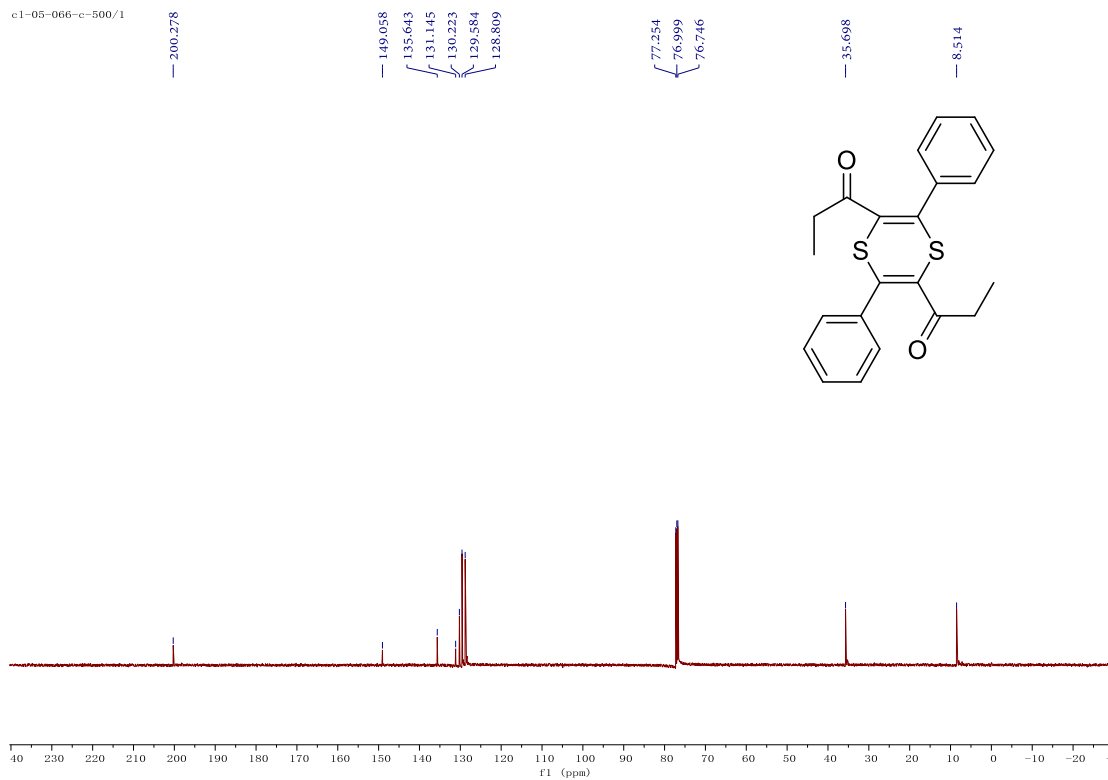

c1-05-077-2-h/1

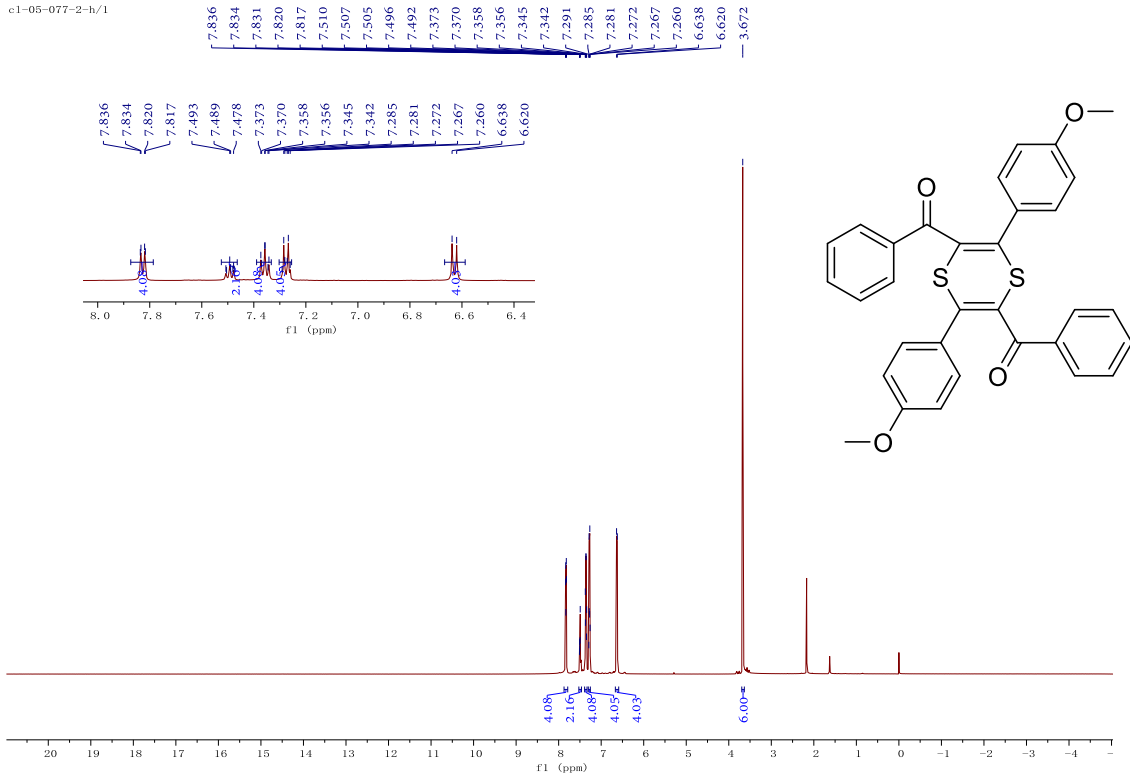

c1-05-077-2-c/1

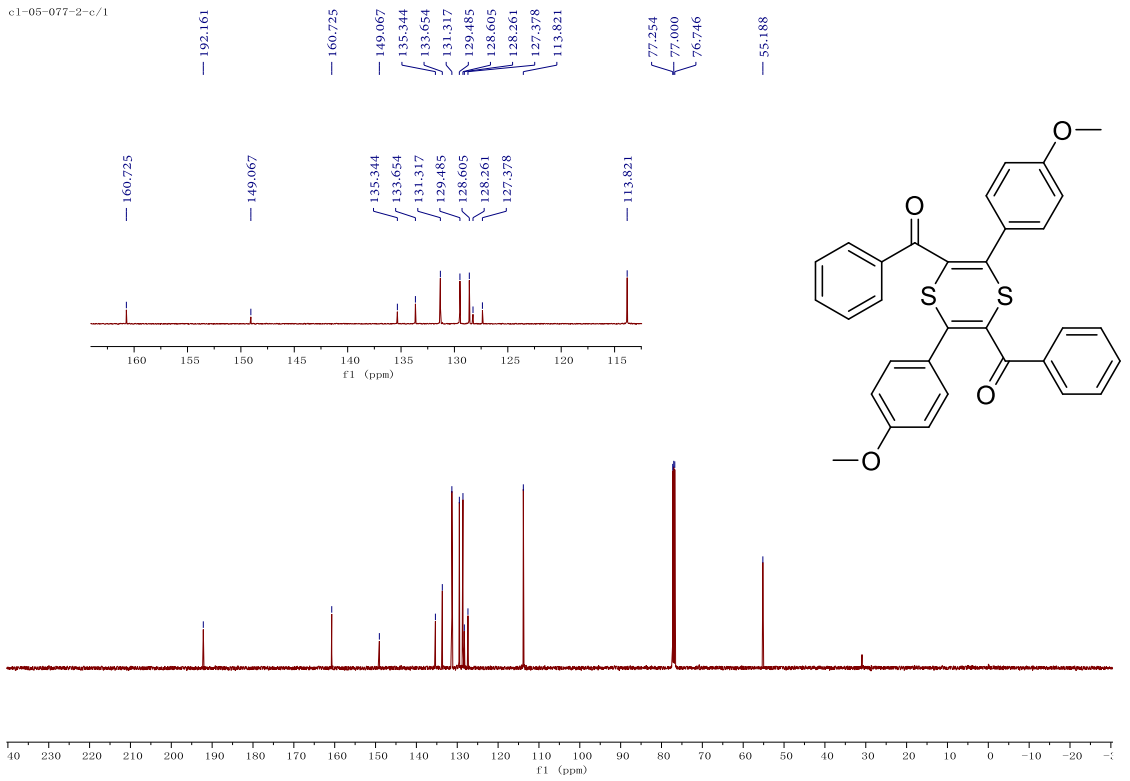



c1-03-036-h.2.fid

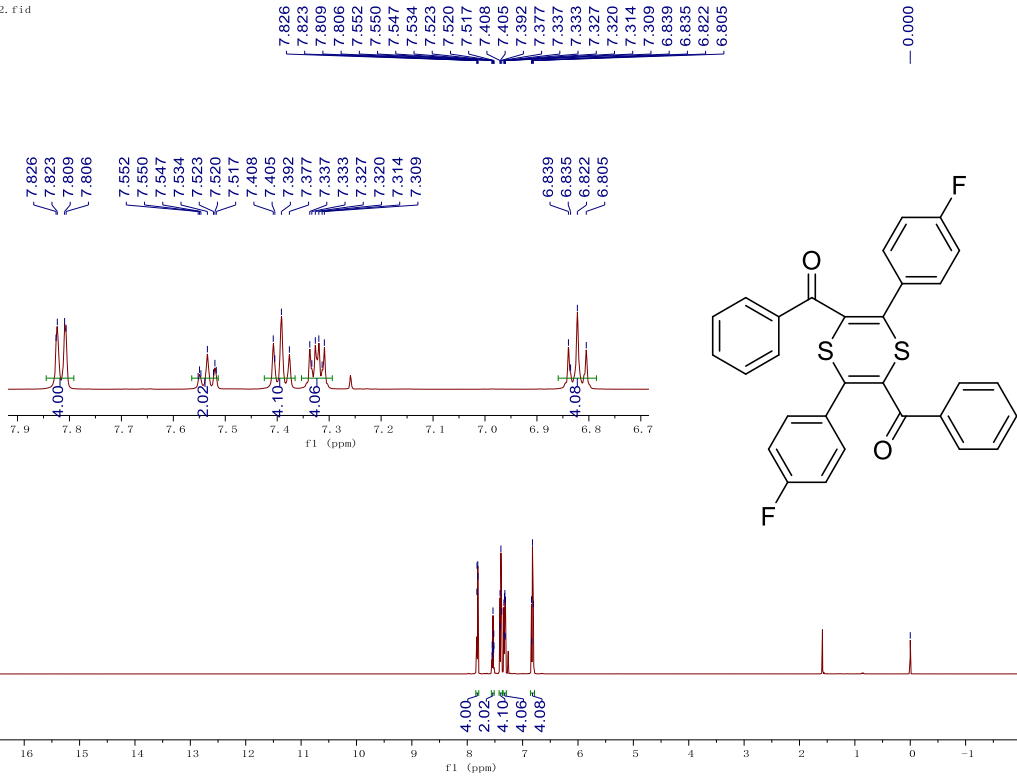

c1-03-036-c.2.fid

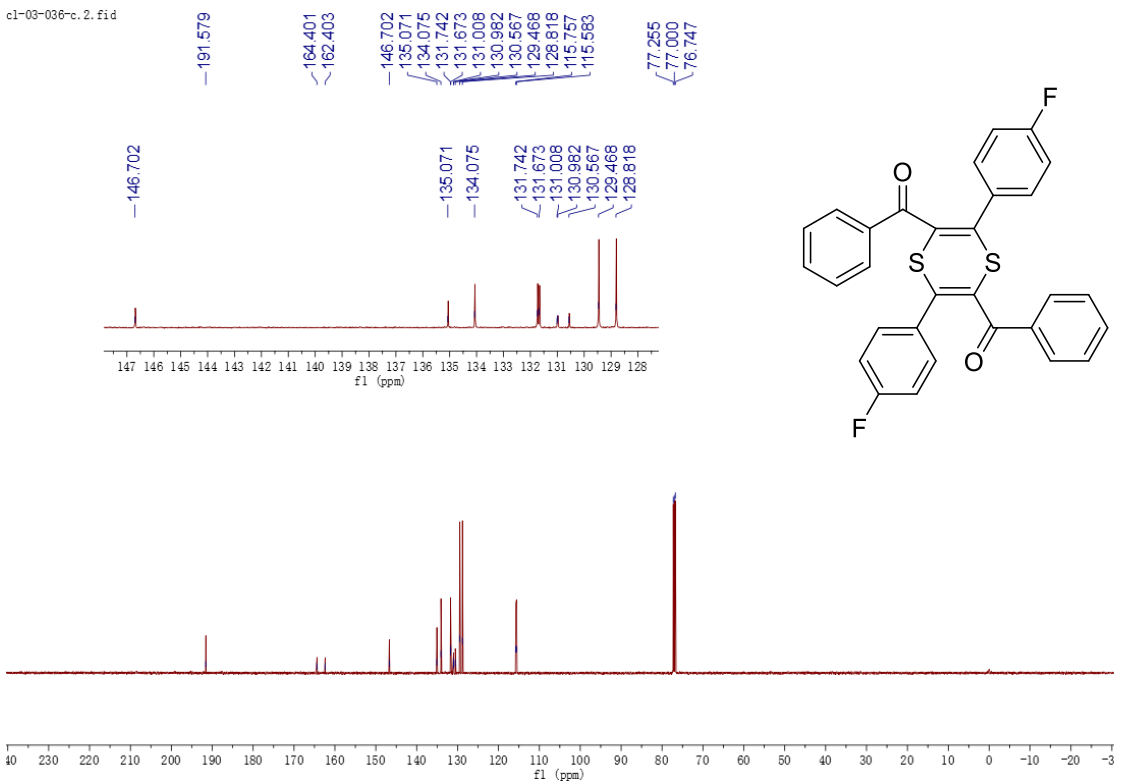

c1-03-035-h, 10. fid

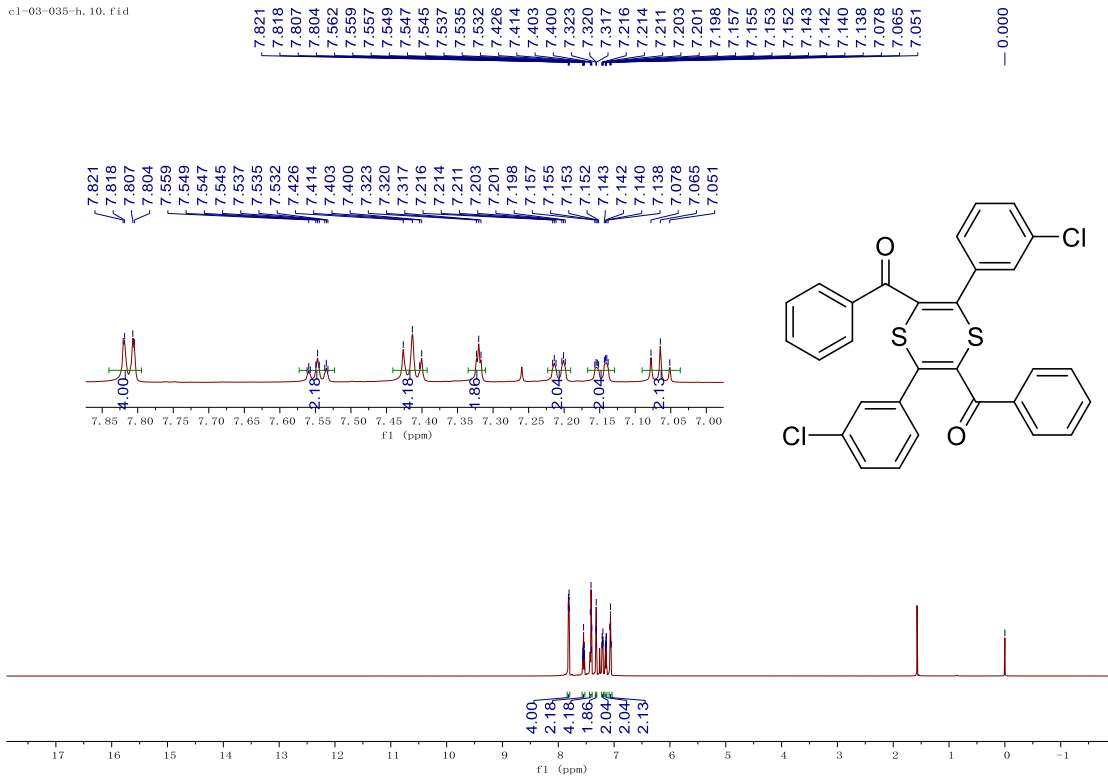

c1-03-035-e, 11. fid

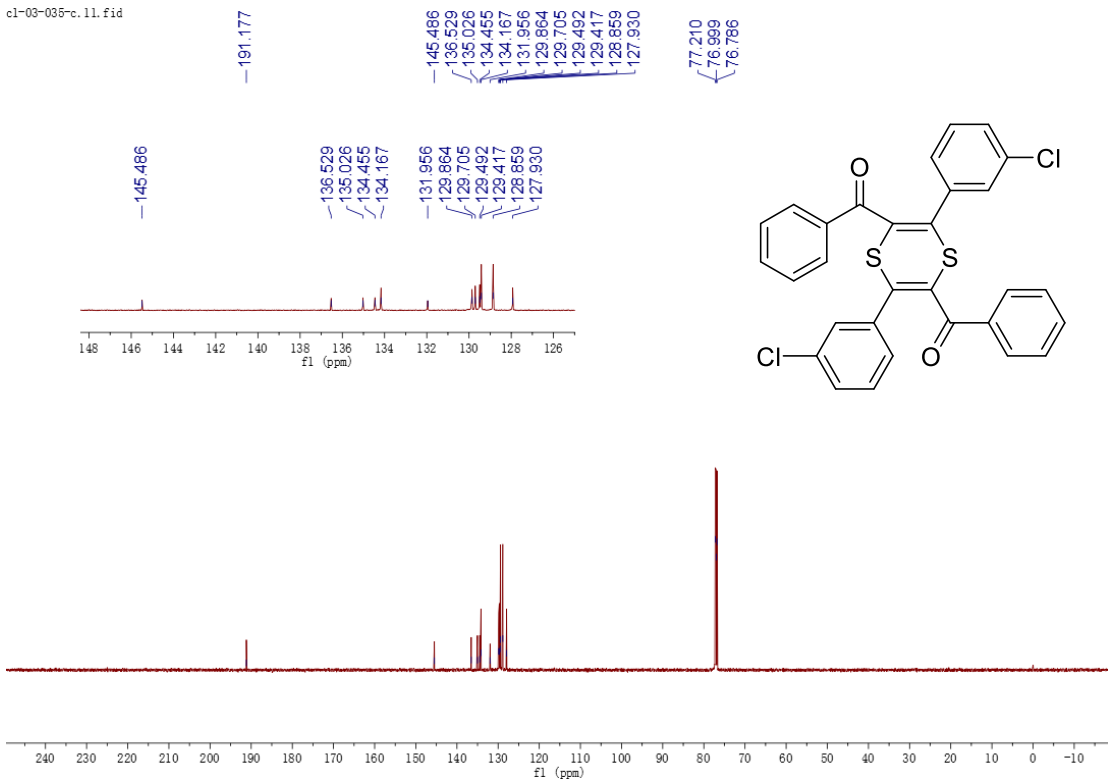

c1-05-073-h/1

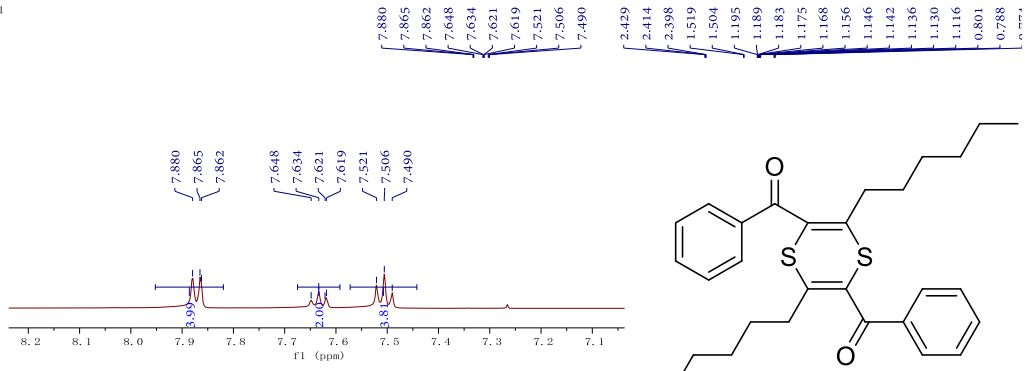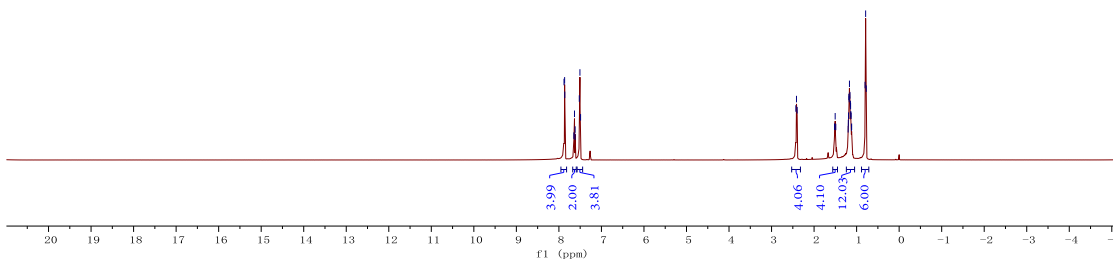

c1-05-073-c/1

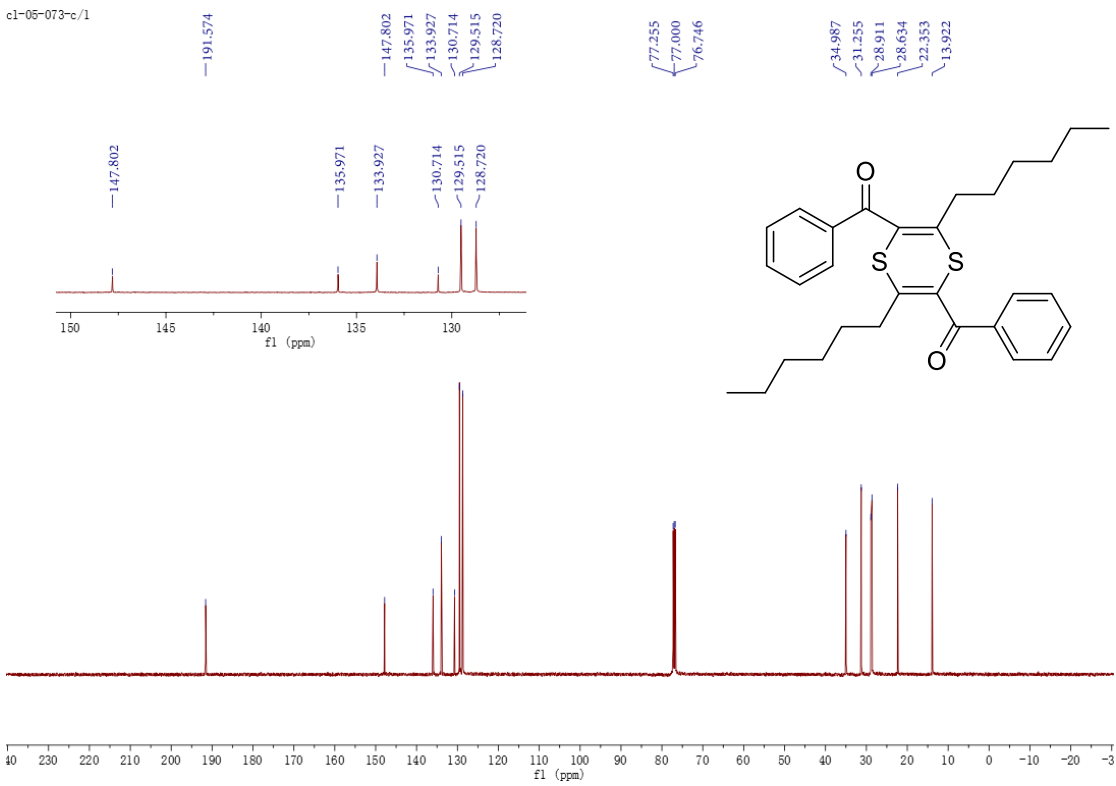

c1-05-079-h/2

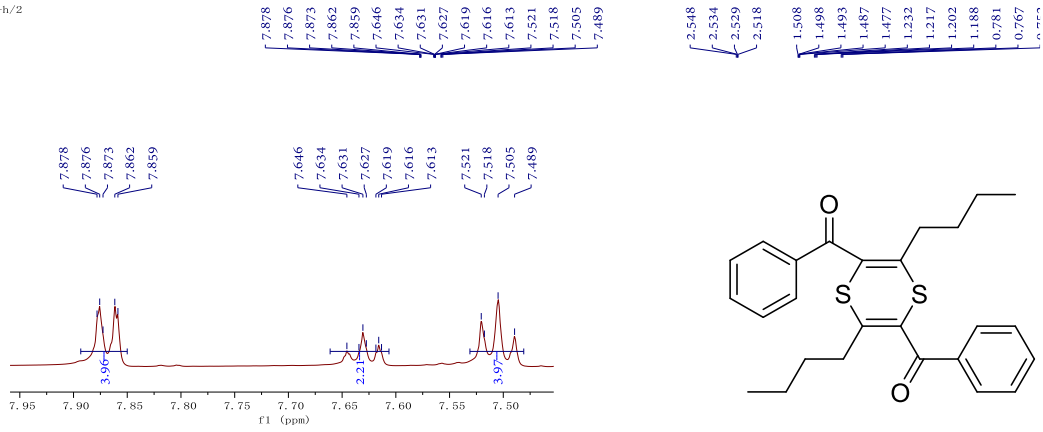

c1-05-079-c/1

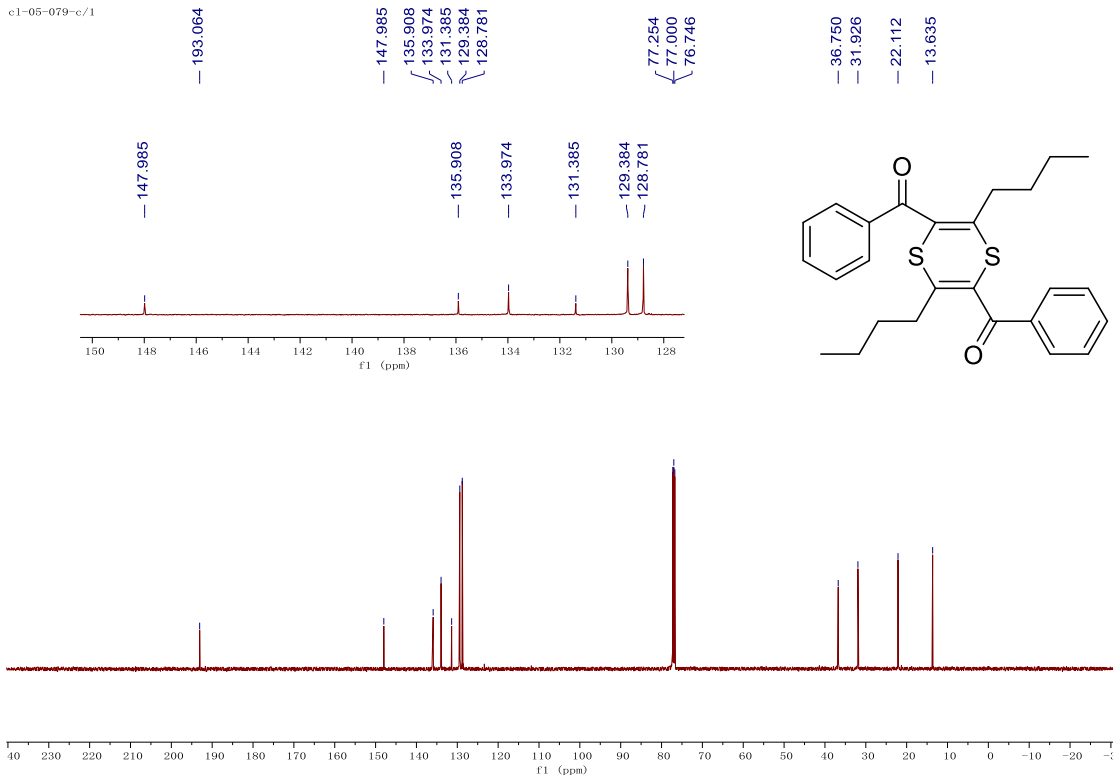

c1-05-067-h/1

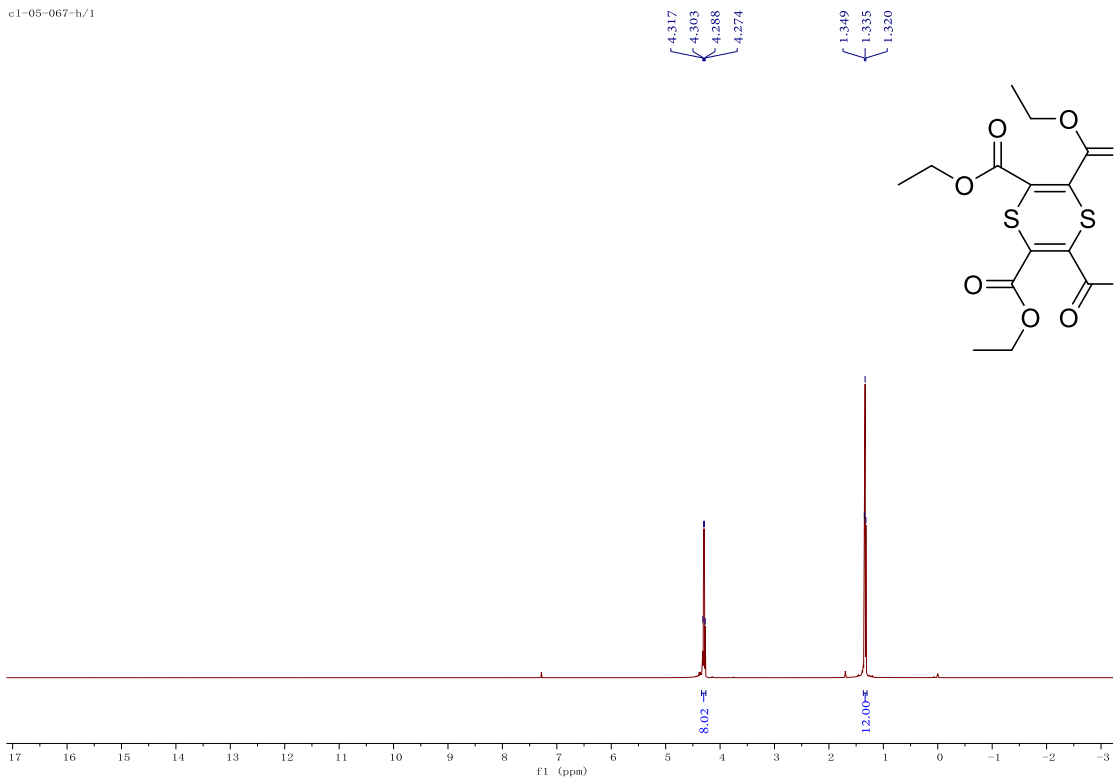

c1-05-067-c/1

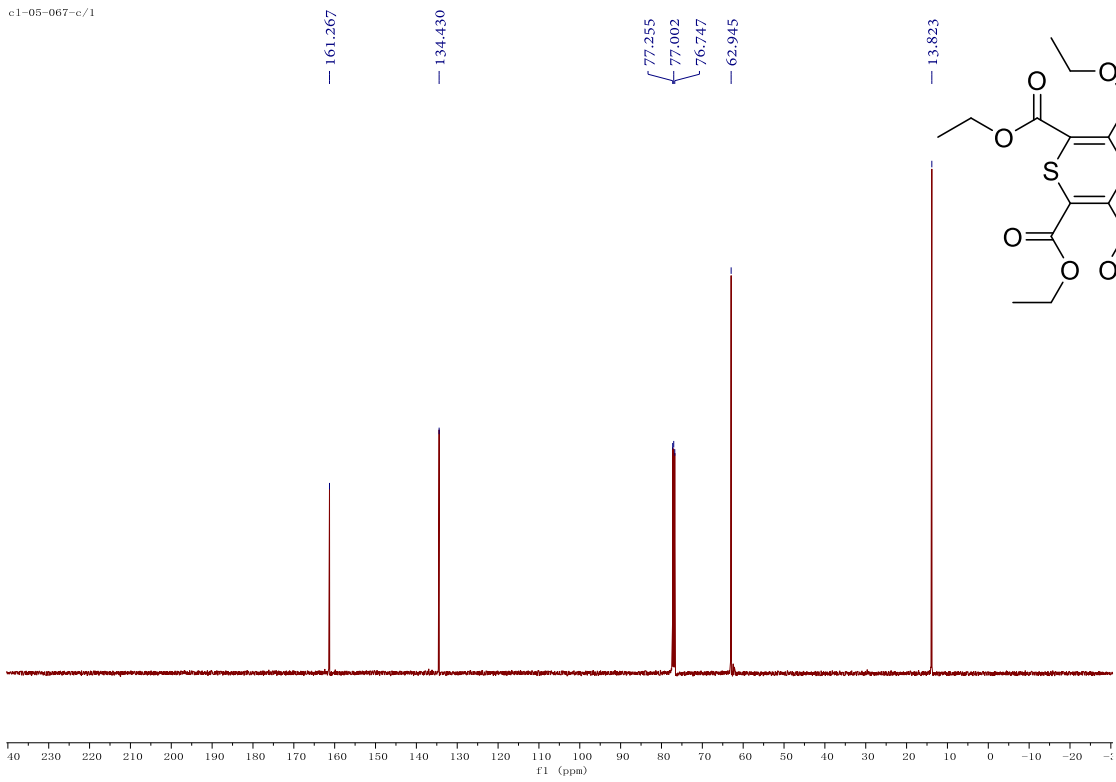

c1-08-030-3-h/1

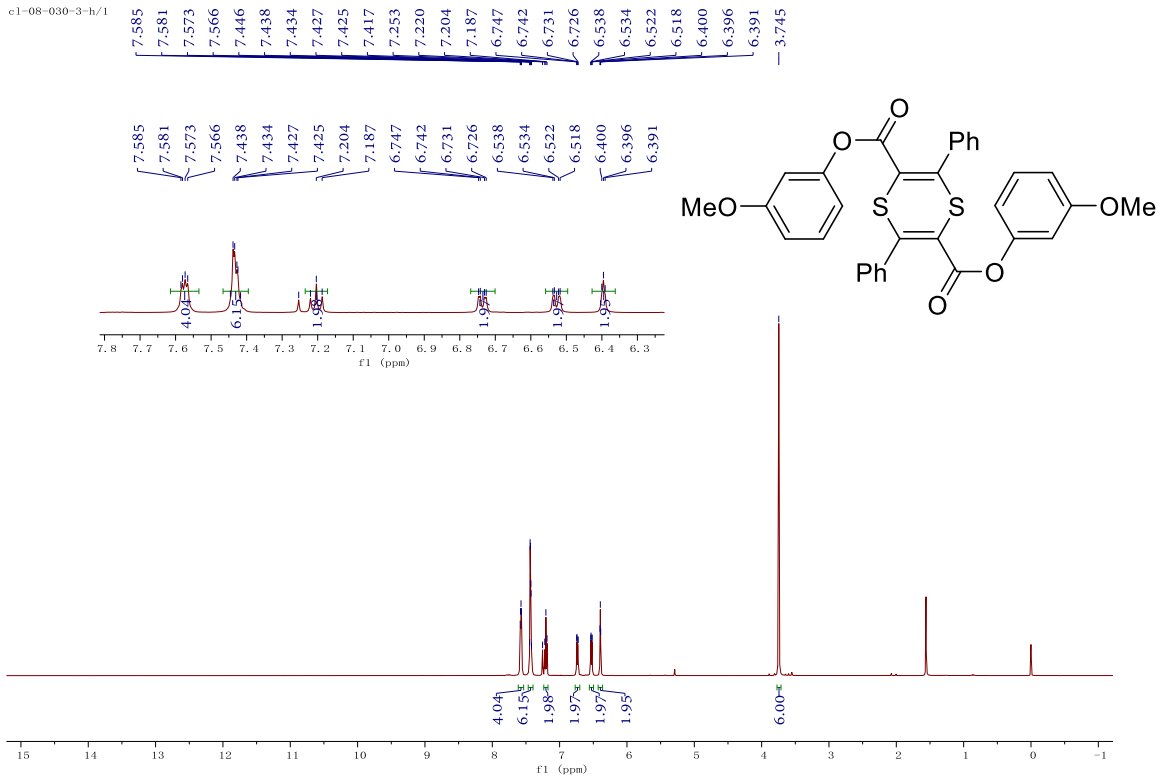

c1-08-030-3-c/2

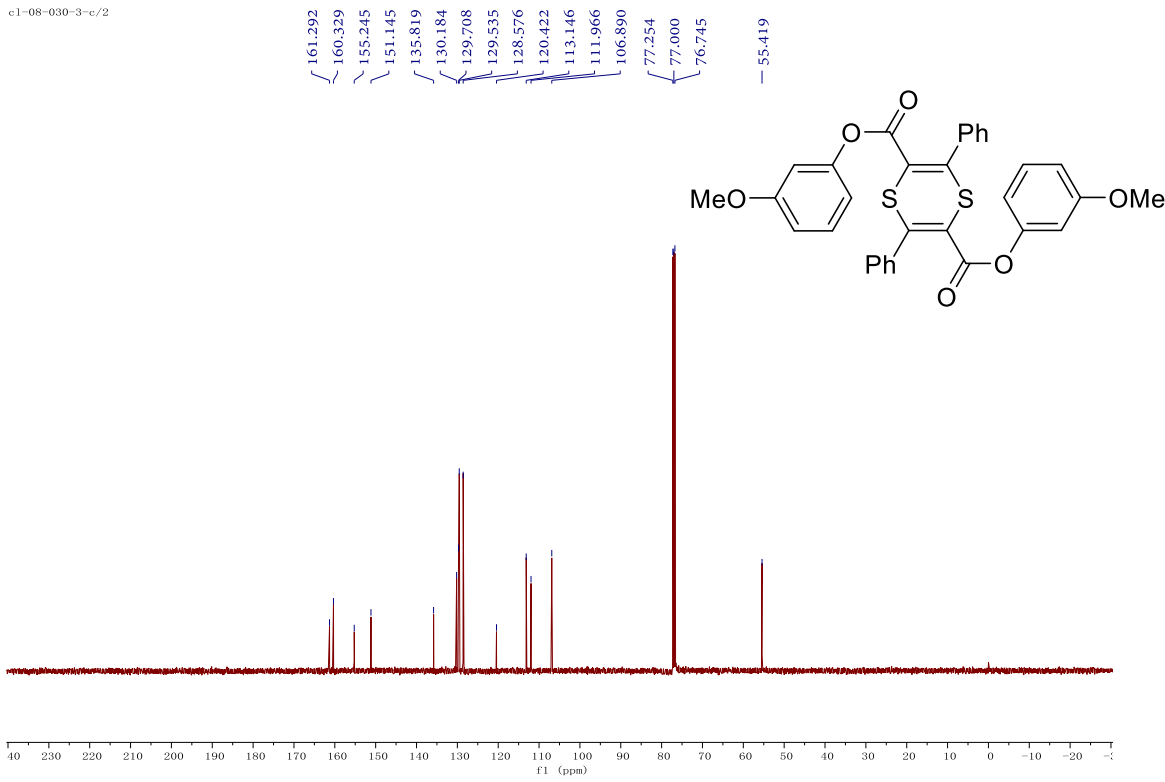

c1-03-064-h. 1. fid

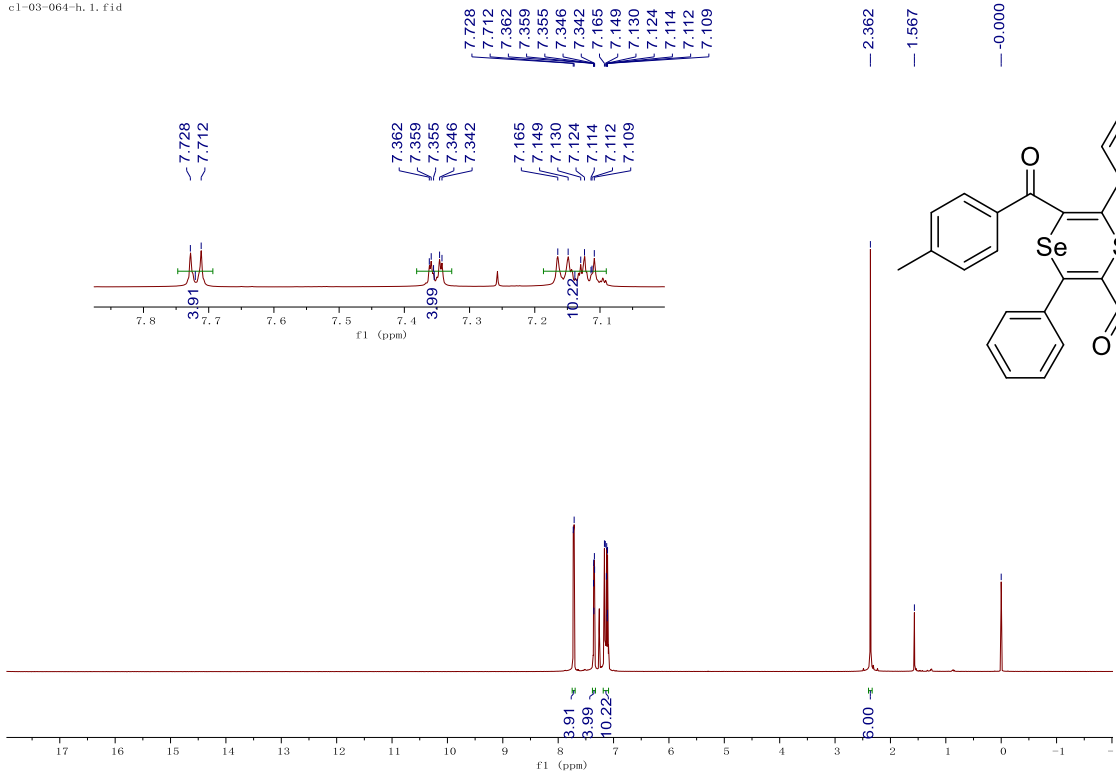

c1-03-064-c. 1. fid

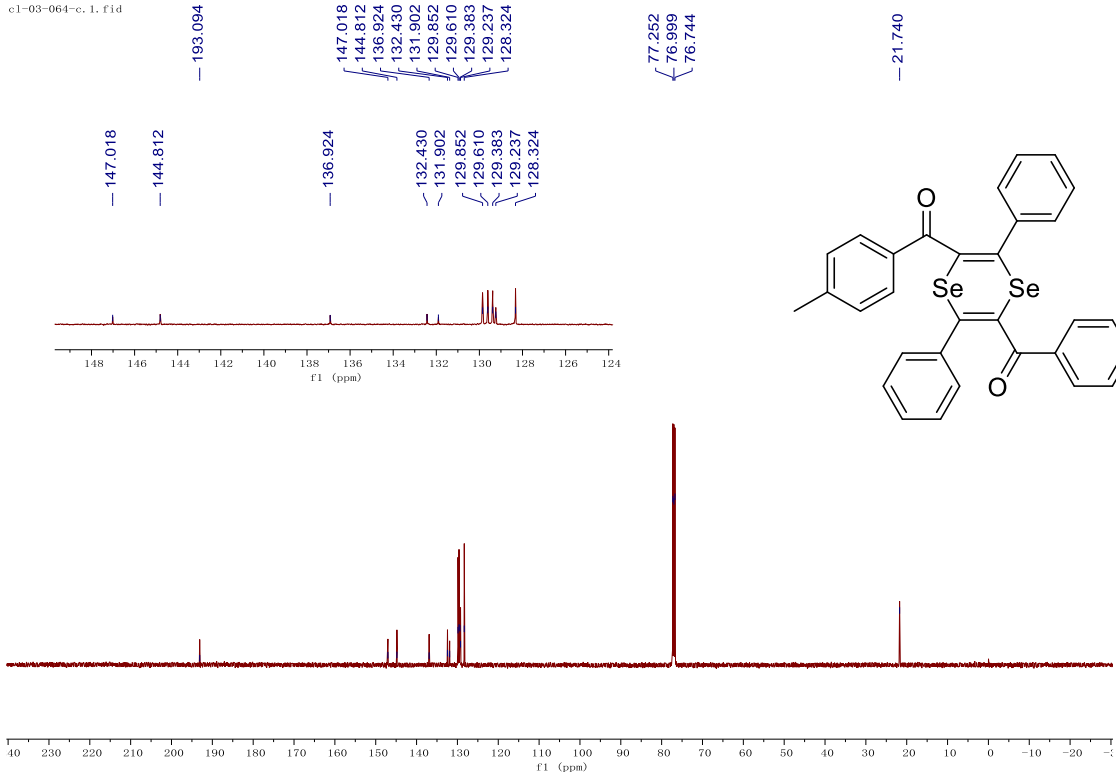

c1-03-071-h. 2. fid

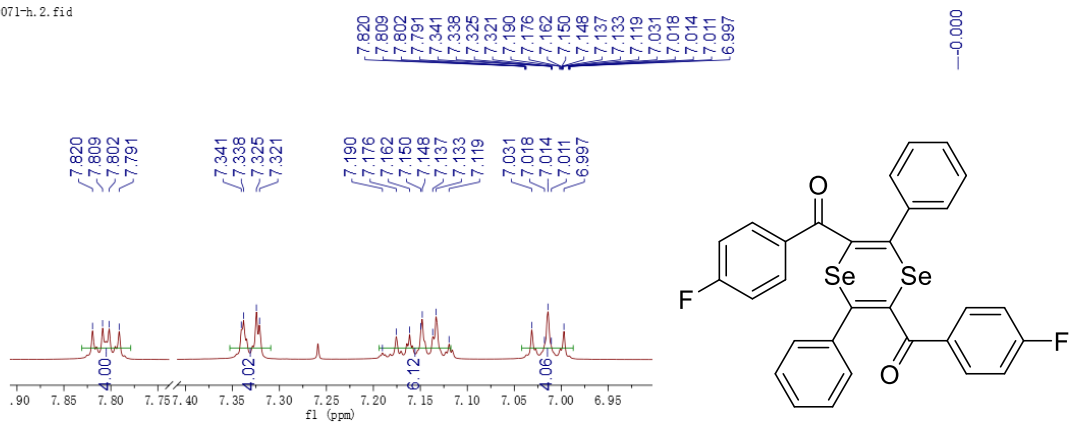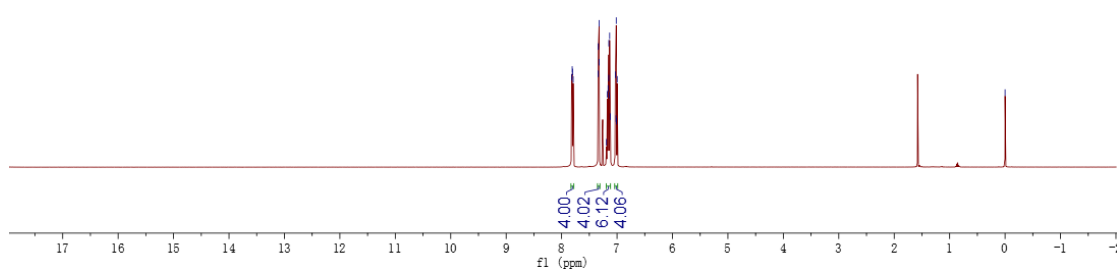

c1-03-071-c. 2. fid

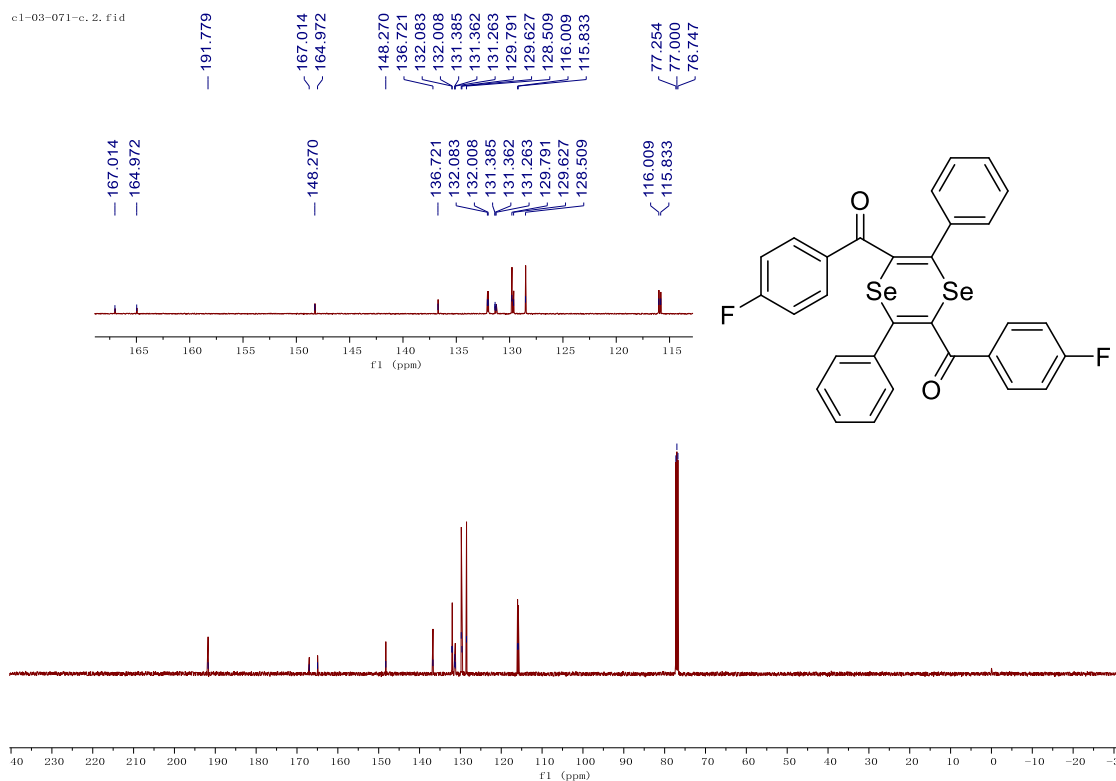



c1-05-077-h/1

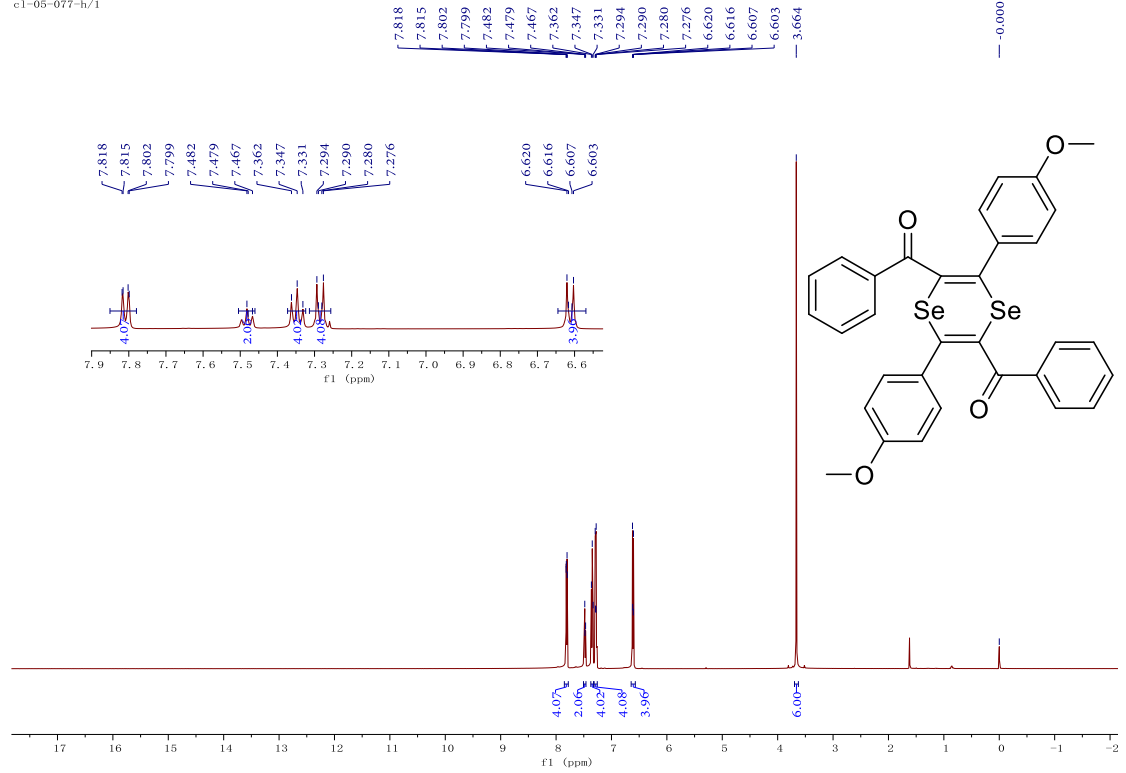

c1-05-077-e/1

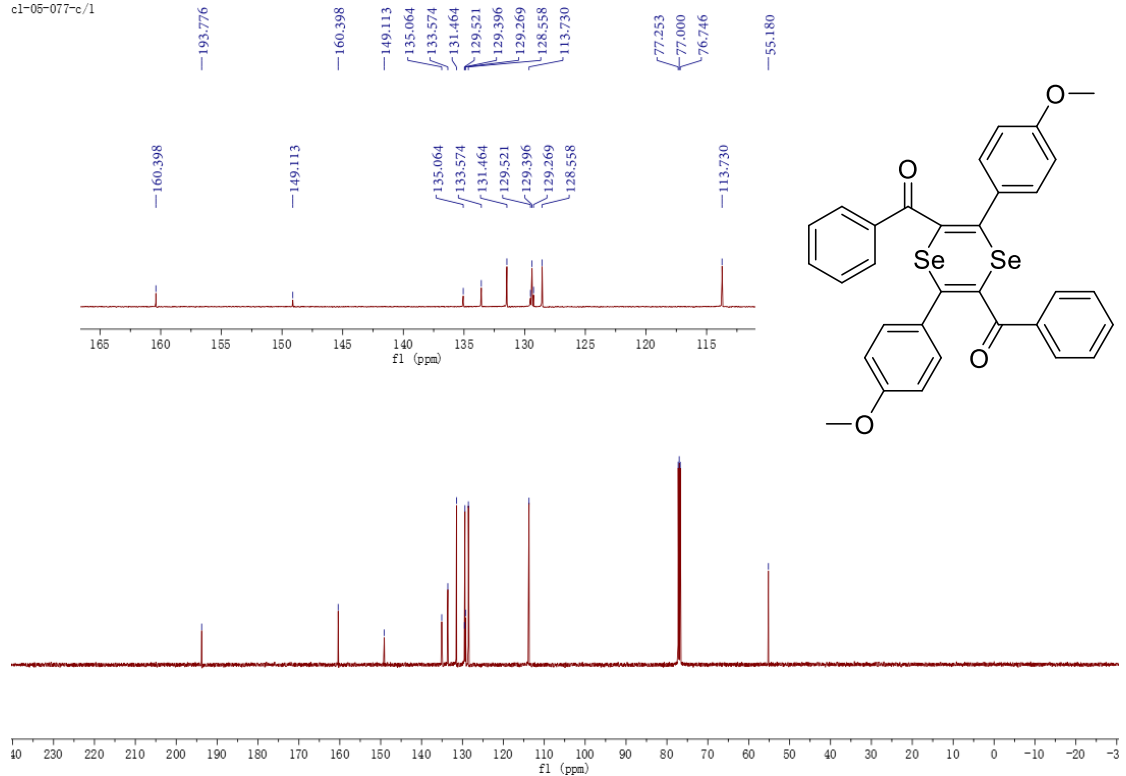

c1-05-078-h/2

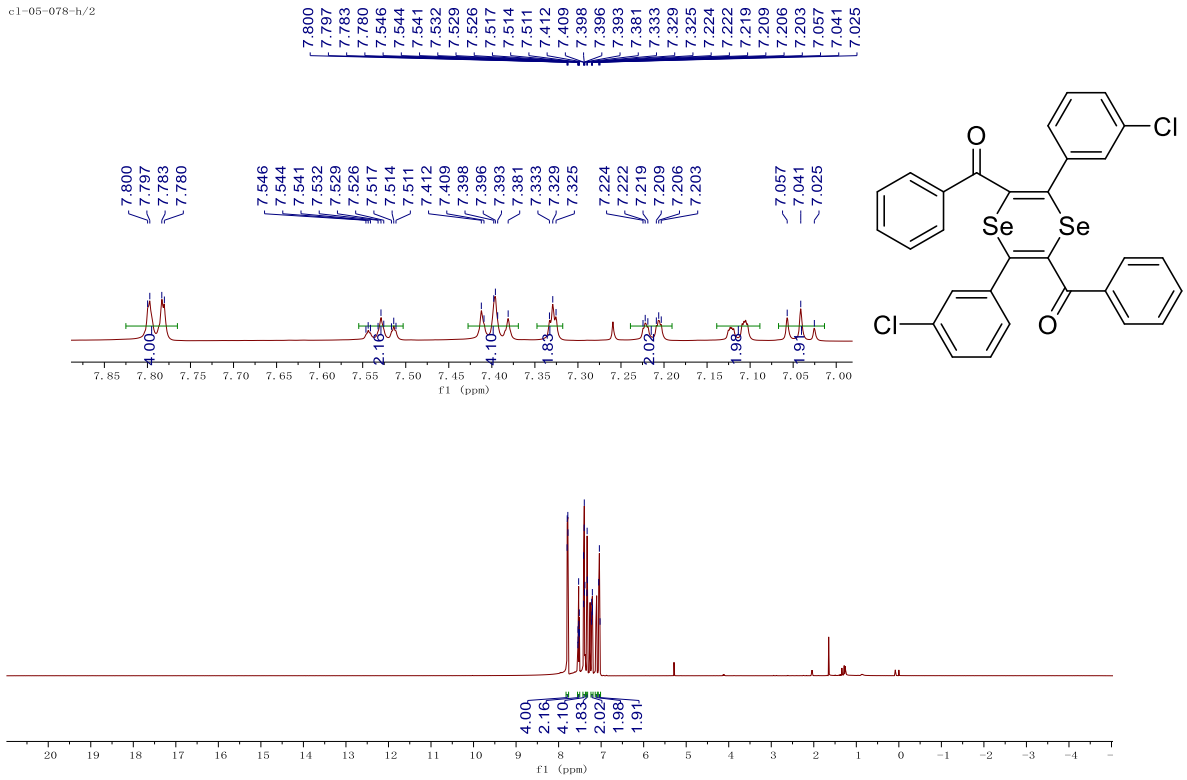

c1-05-078-c/1

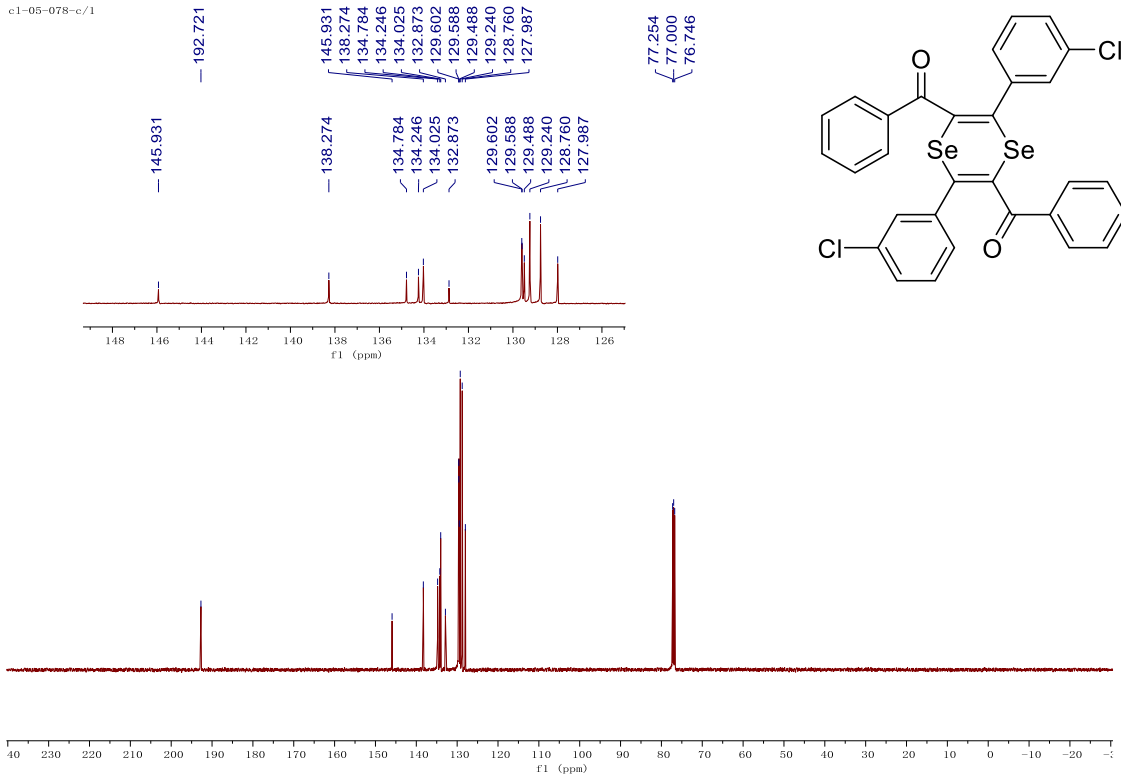

c1-05-079-h/2

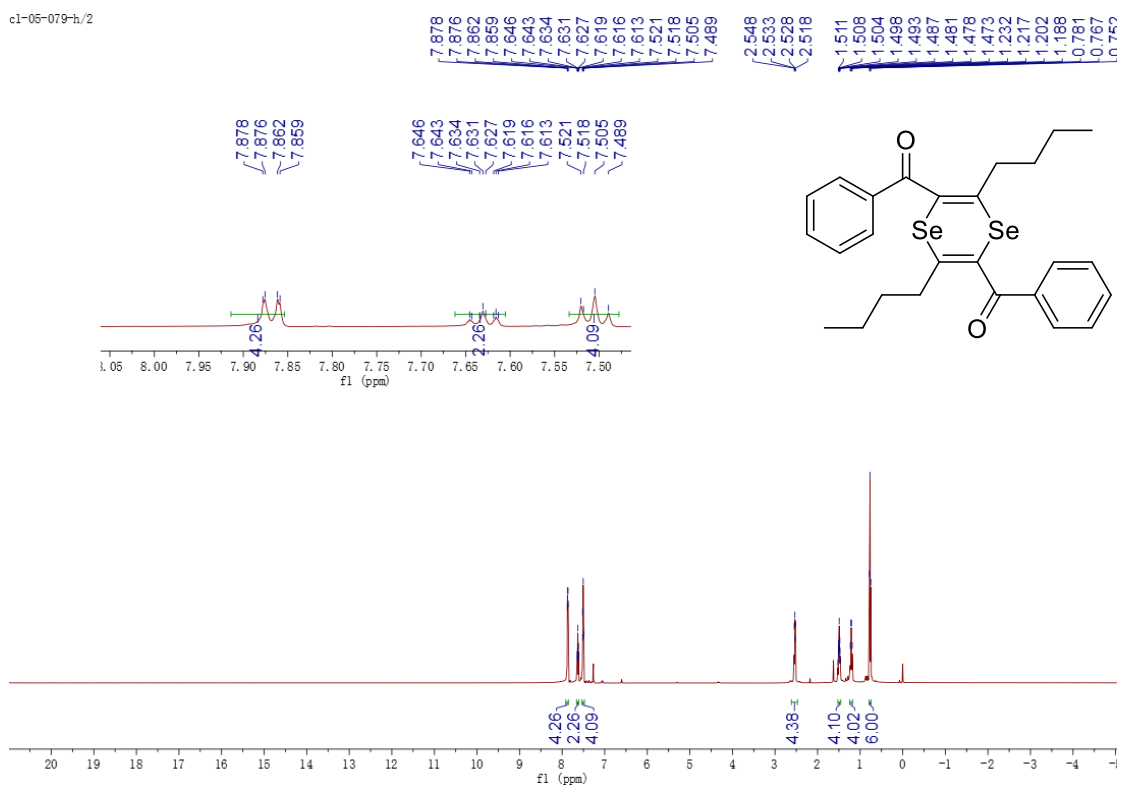

c1-05-079-c/1

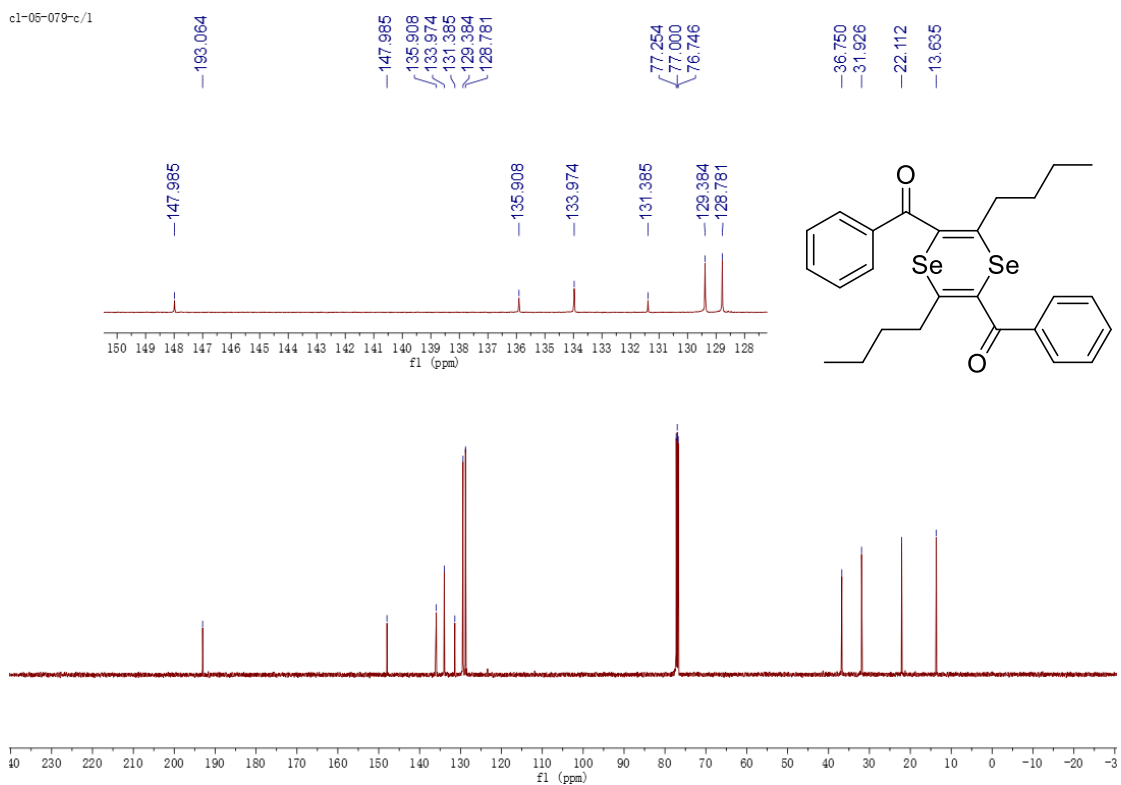

c1-05-087-h/1

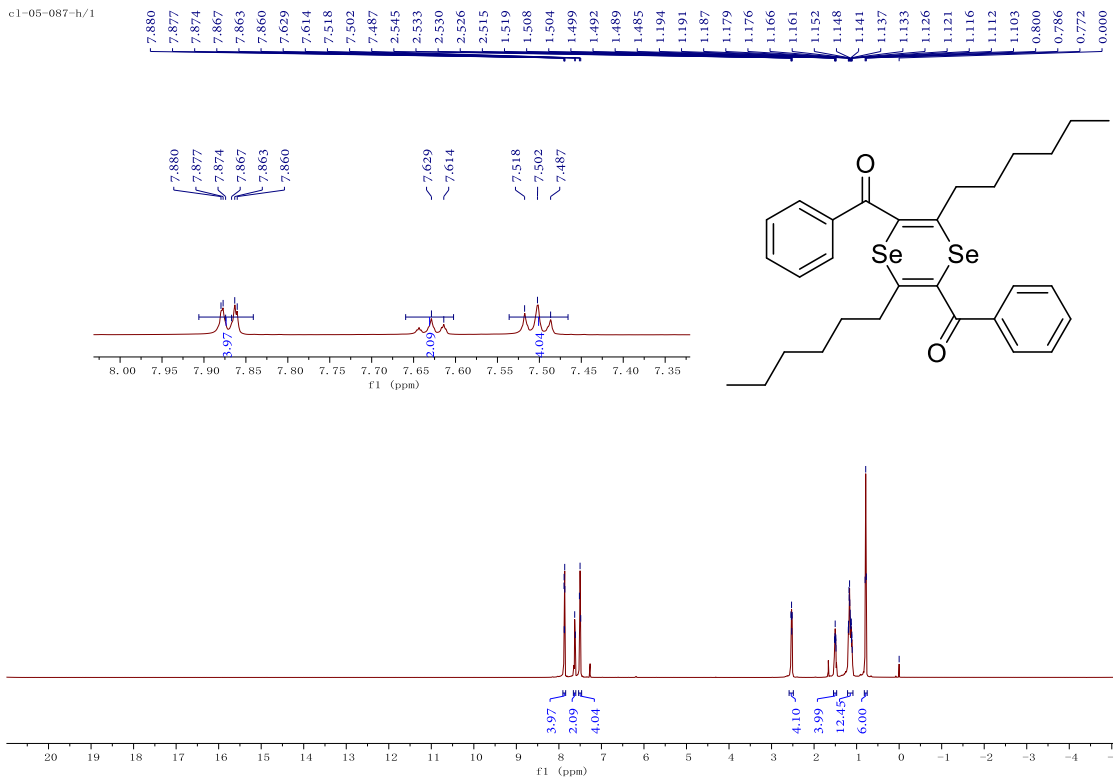

c1-05-087-c/1

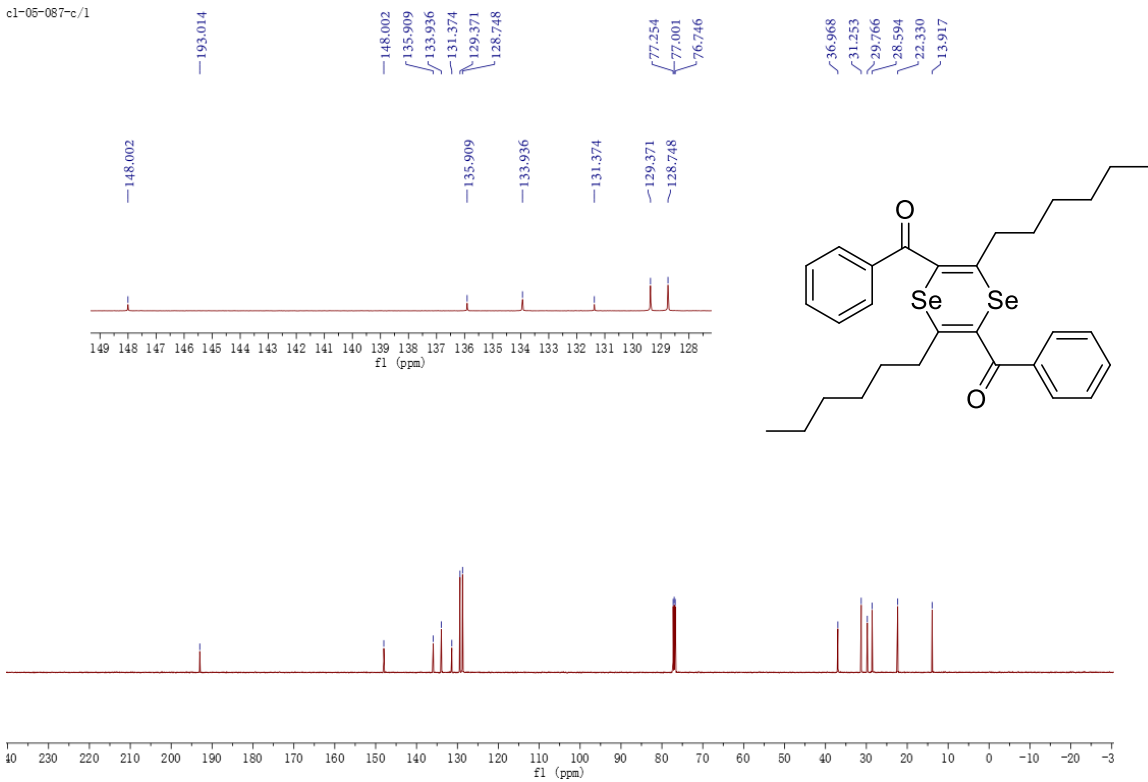

c1-04-052-3-h.1.fid

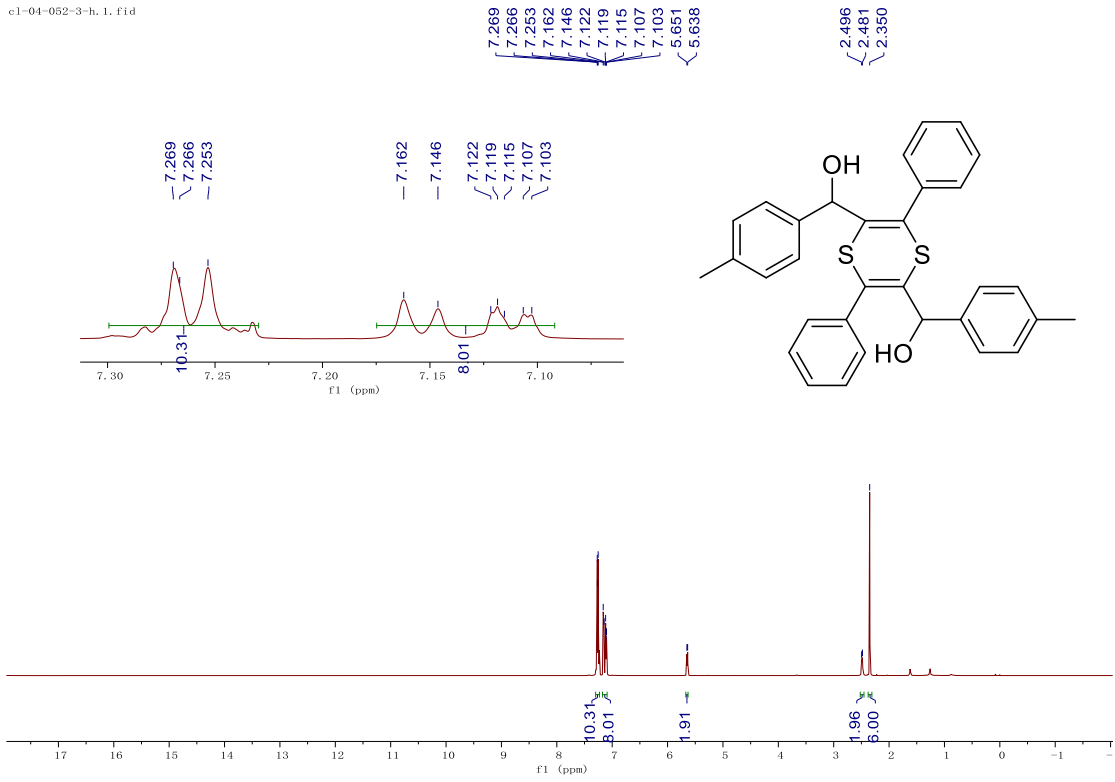

c1-04-052-2-e.1.fid

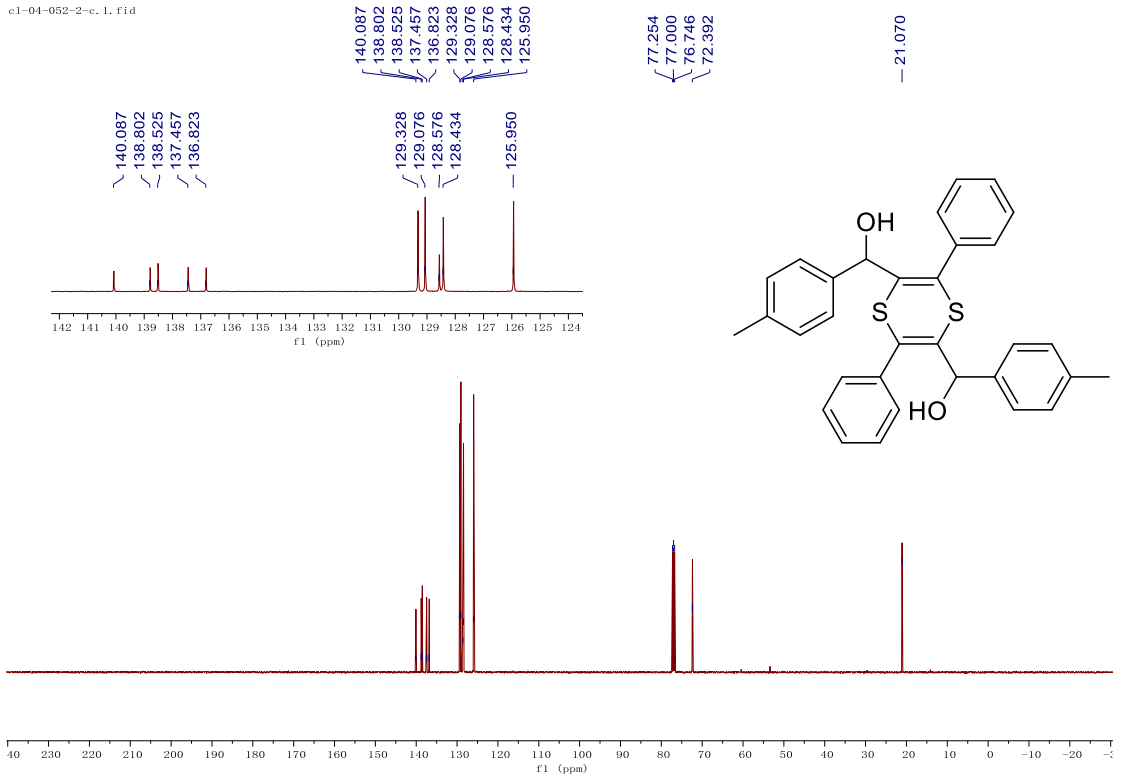

c1-04-059-h/1

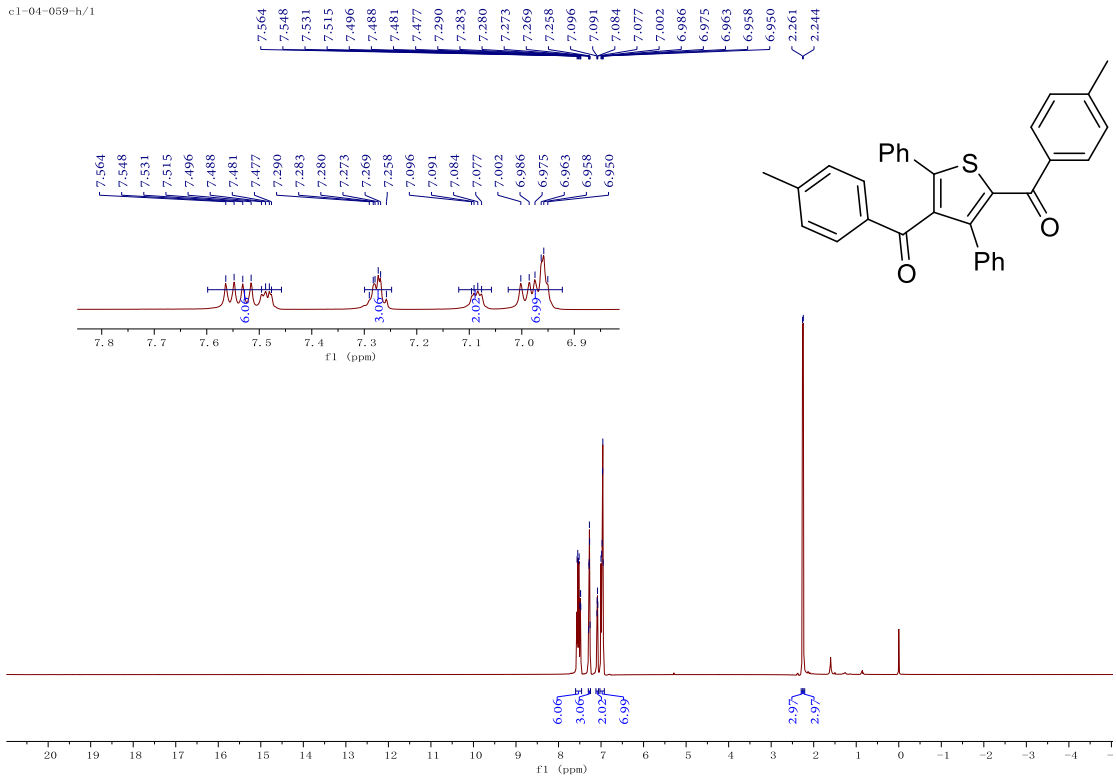

c1-04-059-e. 1. fid

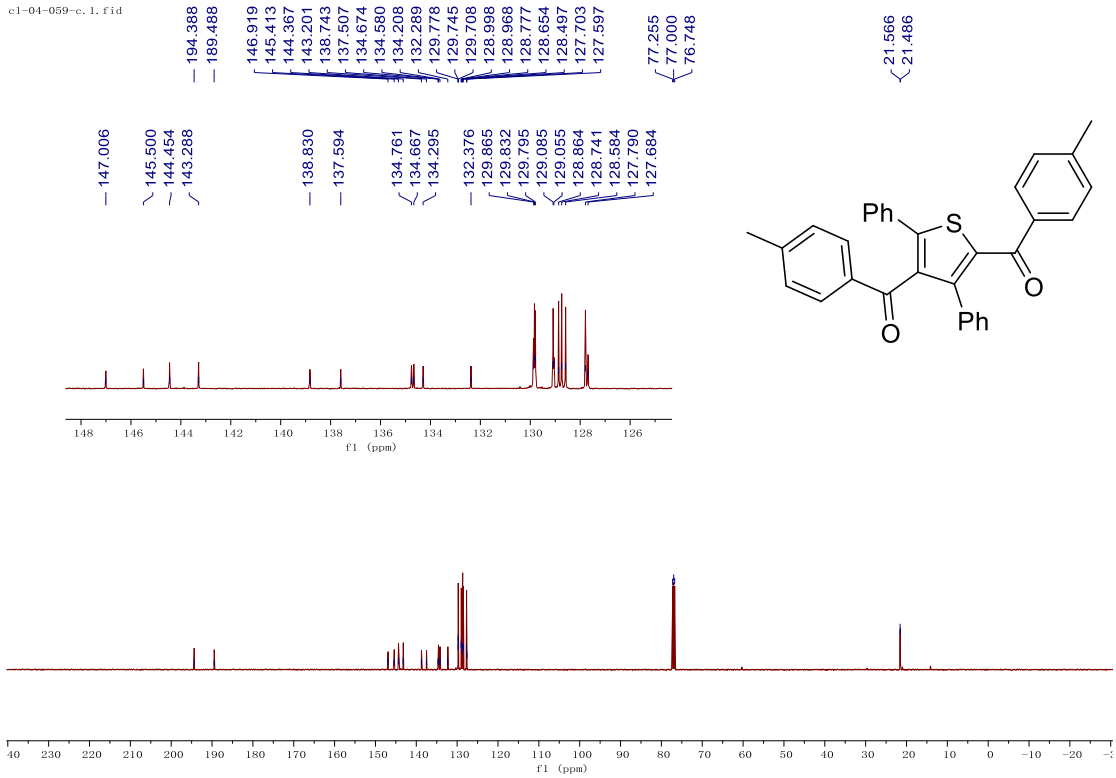

c1-06-062-h/1

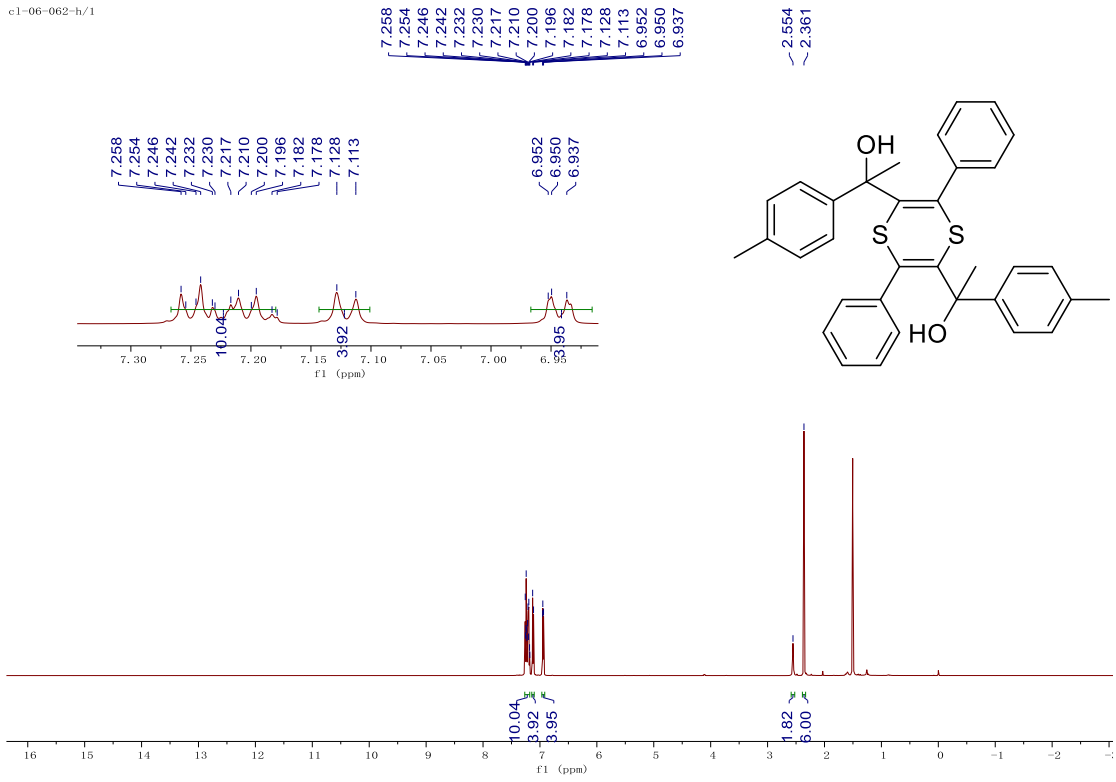

c1-06-063-c/1

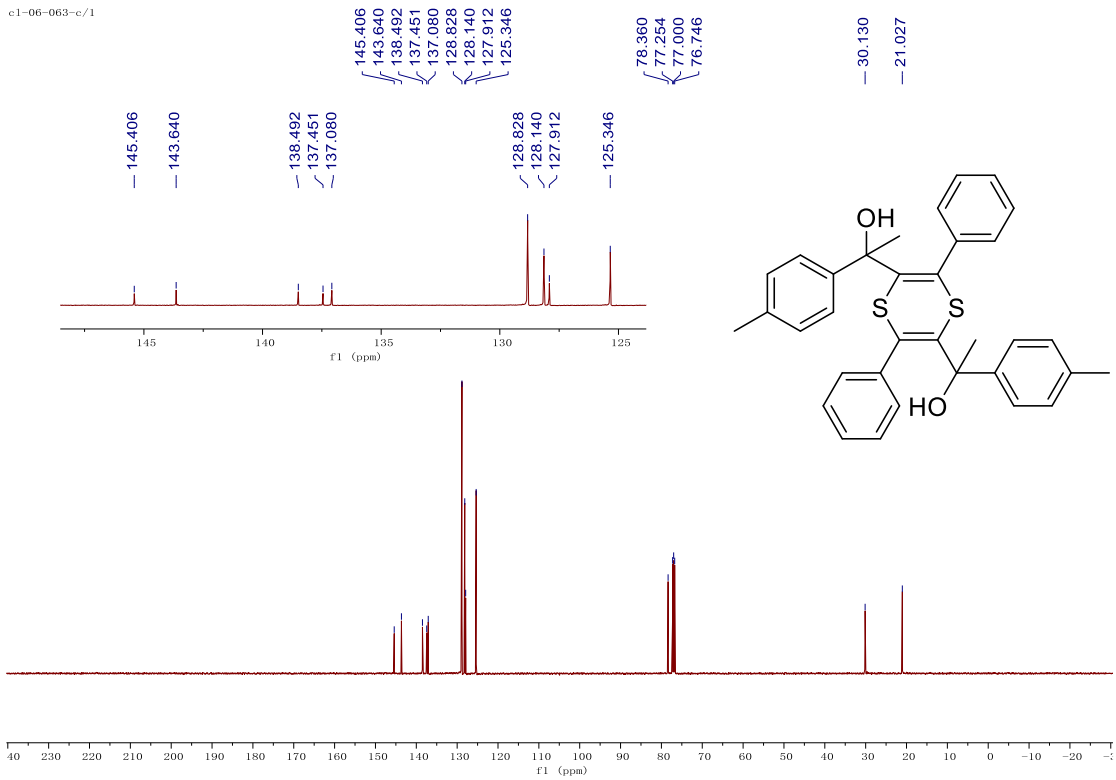

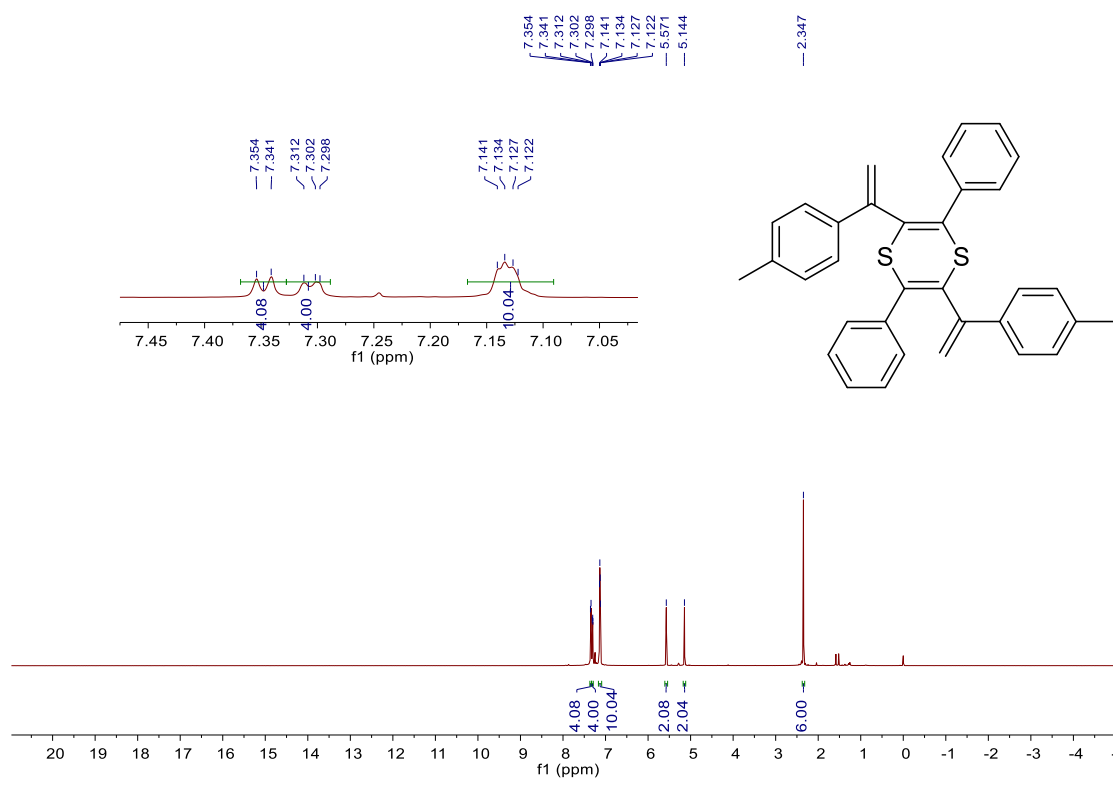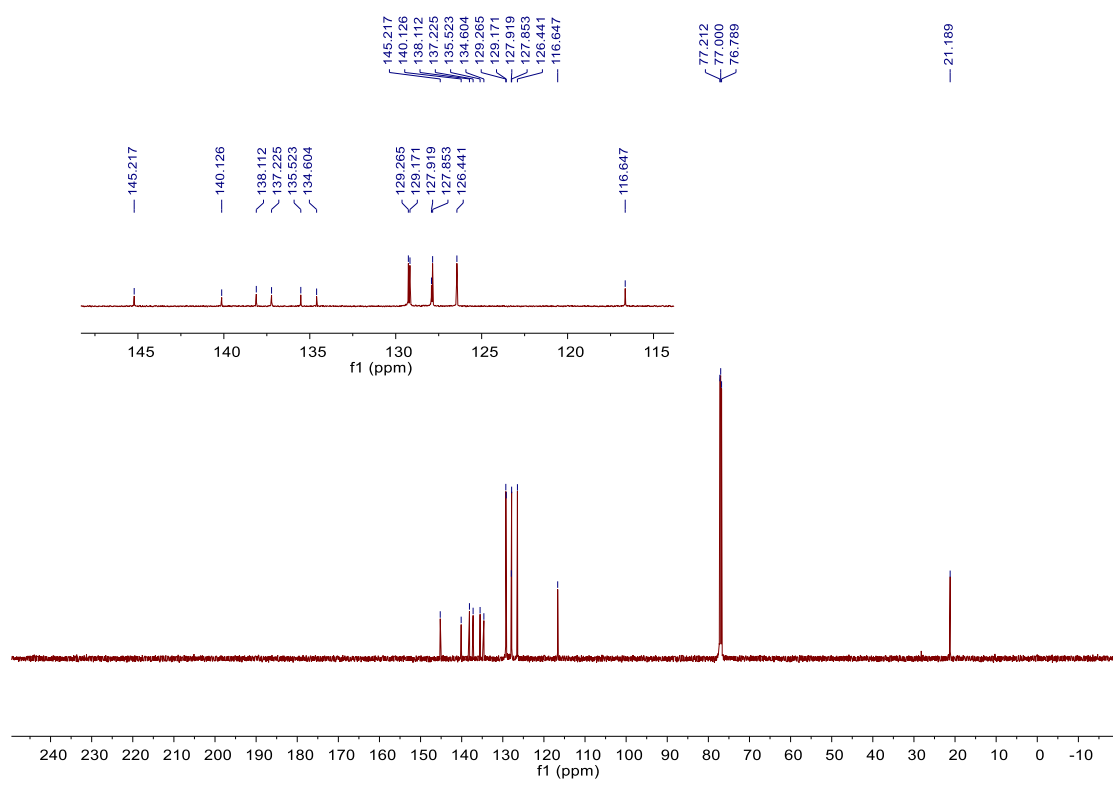



cl-qingjiyuanliao-h/

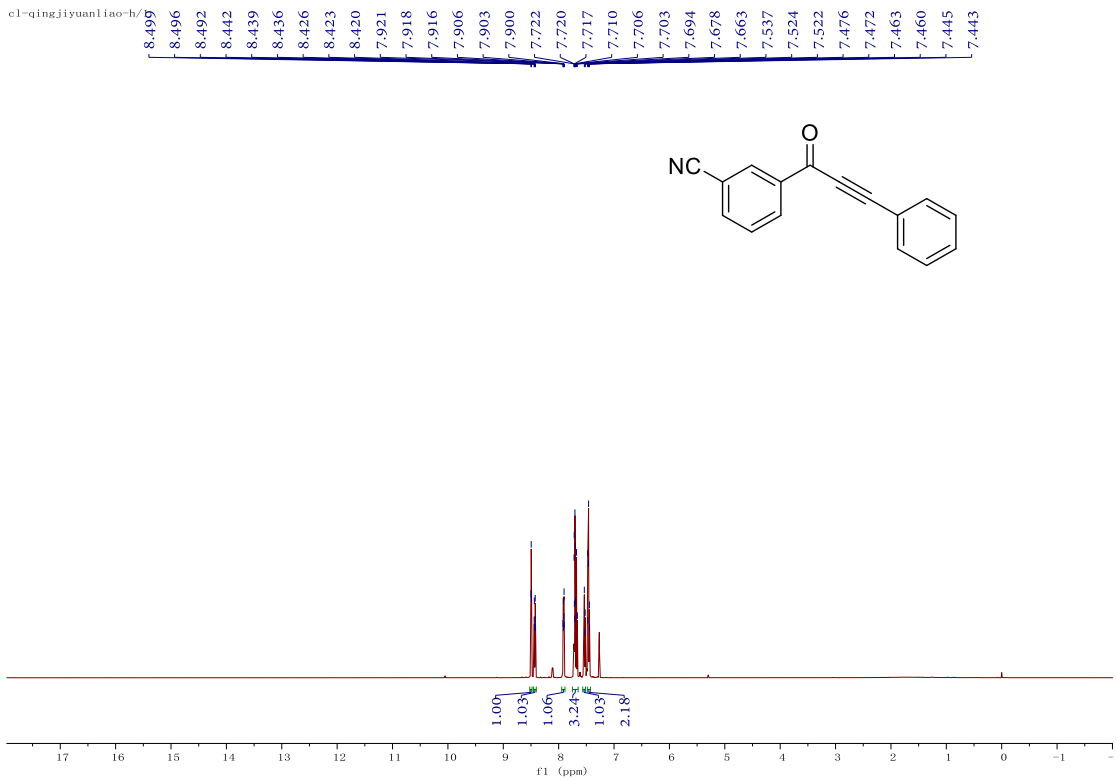

cl-qingjiyuanliao-1213-c/1

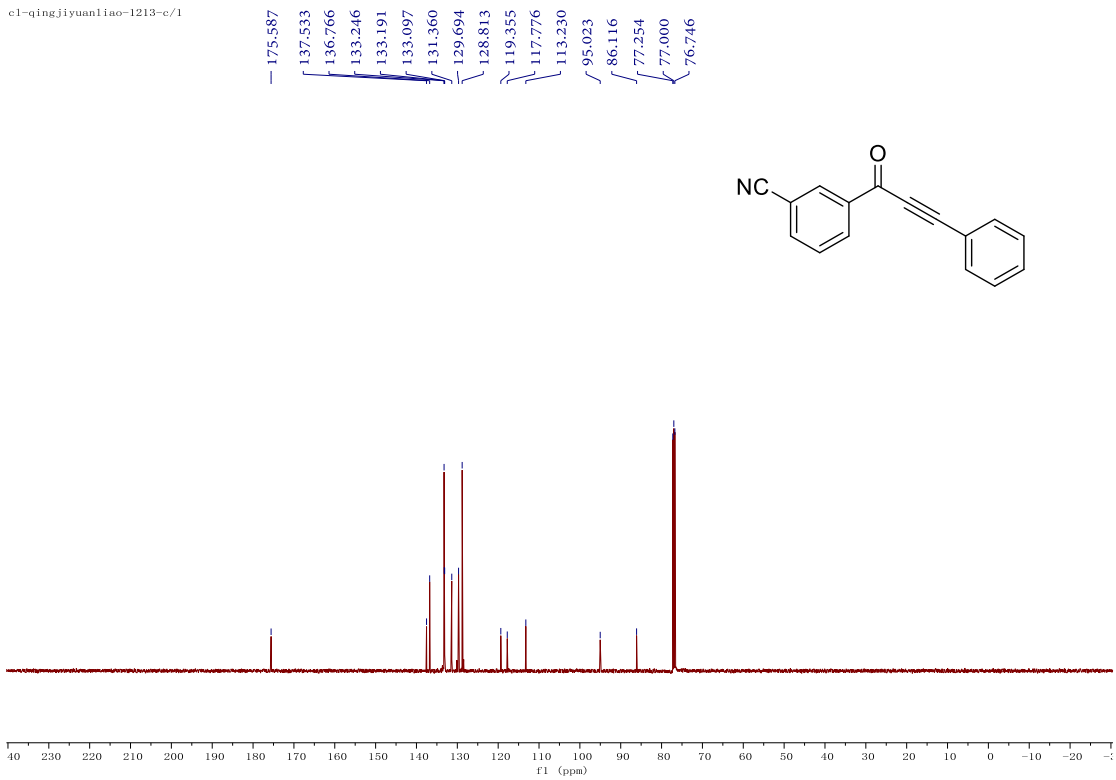

## 6. X-Ray Crystal Structure of 3h (CCDC: 2201657)

### (3,6-diphenyl-1,4-dithiine-2,5-diyl)bis((1-methyl-1H-indol-2-yl)methanone) (3h)

Sample preparation for crystal growth: Compound **3h** (50 mg) was dissolved in the mixed solvent of dichloromethane/petroleum ether = 3 ml/6 ml in a 50 mL round-bottom flask. The yellow single crystal of **3h** was obtained by slowly evaporating mixed solvent at room temperature under air.

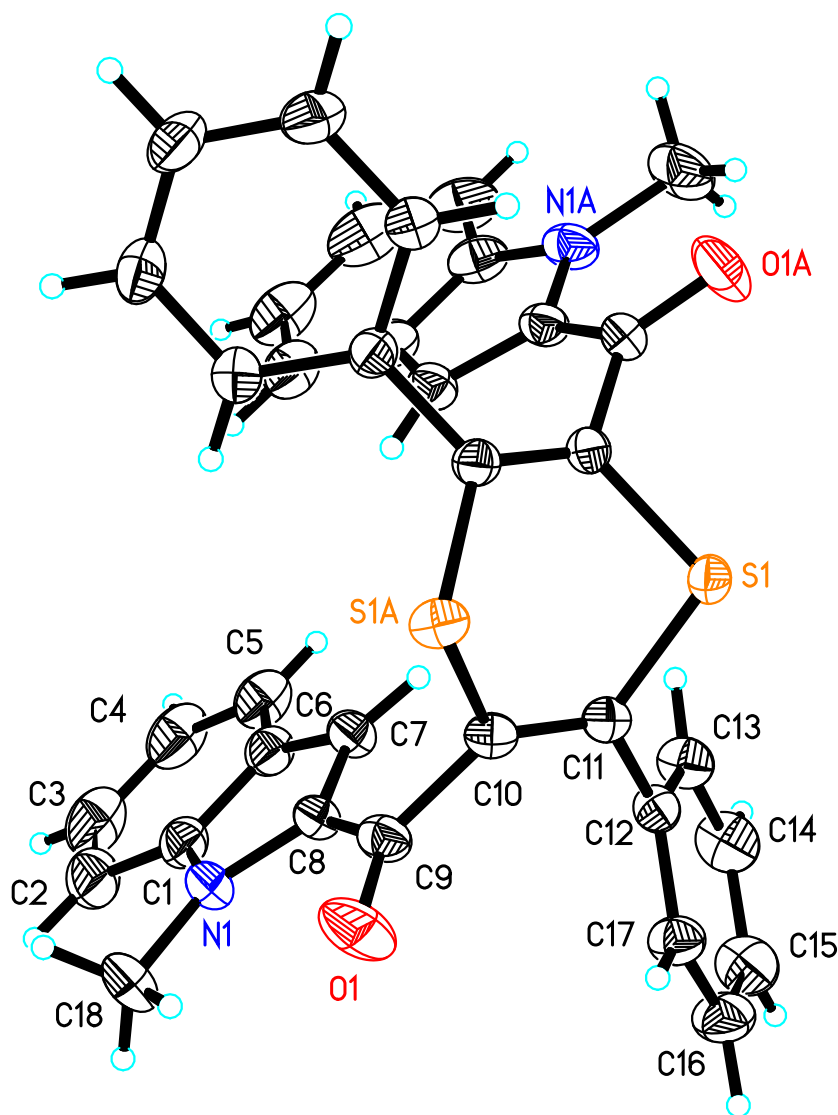

Table S1. Crystal data and structure refinement for **3h**

|                                   |                                                                                                              |
|-----------------------------------|--------------------------------------------------------------------------------------------------------------|
| Identification code               | <b>3h</b>                                                                                                    |
| Empirical formula                 | C <sub>36</sub> H <sub>26</sub> N <sub>2</sub> O <sub>2</sub> S <sub>2</sub>                                 |
| Formula weight                    | 582.71                                                                                                       |
| Temperature                       | 293(2) K                                                                                                     |
| Wavelength                        | 0.71073 Å                                                                                                    |
| Crystal system                    | Monoclinic                                                                                                   |
| Space group                       | C 21/c                                                                                                       |
| Unit cell dimensions              | a = 16.5229(12) Å      α = 90°.<br>b = 10.3183(8) Å      β = 114.004(2)°.<br>c = 19.3418(16) Å      γ = 90°. |
| Volume                            | 3012.4(4) Å <sup>3</sup>                                                                                     |
| Z                                 | 4                                                                                                            |
| Density (calculated)              | 1.285 Mg/m <sup>3</sup>                                                                                      |
| Absorption coefficient            | 0.212 mm <sup>-1</sup>                                                                                       |
| F(000)                            | 1216                                                                                                         |
| Crystal size                      | 0.200 x 0.150 x 0.120 mm <sup>3</sup>                                                                        |
| Theta range for data collection   | 2.391 to 25.999°.                                                                                            |
| Index ranges                      | -20 ≤ h ≤ 20, -12 ≤ k ≤ 12, -23 ≤ l ≤ 23                                                                     |
| Reflections collected             | 21487                                                                                                        |
| Independent reflections           | 2917 [R(int) = 0.0287]                                                                                       |
| Completeness to theta = 25.242°   | 98.9 %                                                                                                       |
| Absorption correction             | Semi-empirical from equivalents                                                                              |
| Max. and min. transmission        | 0.7456 and 0.6806                                                                                            |
| Refinement method                 | Full-matrix least-squares on F <sup>2</sup>                                                                  |
| Data / restraints / parameters    | 2917 / 0 / 192                                                                                               |
| Goodness-of-fit on F <sup>2</sup> | 1.024                                                                                                        |
| Final R indices [I > 2σ(I)]       | R1 = 0.0362, wR2 = 0.0961                                                                                    |
| R indices (all data)              | R1 = 0.0403, wR2 = 0.0995                                                                                    |
| Extinction coefficient            | 0.0056(18)                                                                                                   |
| Largest diff. peak and hole       | 0.201 and -0.214 e.Å <sup>-3</sup>                                                                           |
